**A remorin from *Nicotiana benthamiana* interacts with the *Pseudomonas* type-III effector protein HopZ1a and is phosphorylated by the immune-related kinase PBS1**

Philip Albers<sup>1</sup>, Suayib Üstün<sup>1§</sup>, Katja Witzel<sup>2</sup>, Max Kraner<sup>3</sup>, Frederik Börnke<sup>1,4\*</sup>

<sup>1</sup>Plant Metabolism, Leibniz-Institute of Vegetable and Ornamental Crops (IGZ), 14979 Großbeeren, Germany

<sup>2</sup>Principles of Integrated Pest Management, Leibniz-Institute of Vegetable and Ornamental Crops (IGZ), 14979 Großbeeren, Germany

<sup>3</sup>Friedrich-Alexander-Universität, Department of Biology, Division of Biochemistry, 91058 Erlangen, Germany

<sup>4</sup>Institute of Biochemistry and Biology, University of Potsdam, 14476 Potsdam, Germany

§Present address: Centre for Plant Molecular Biology, Molecular Genetics, University of Tübingen, 72076 Tübingen, Germany;

**Keywords:** *Pseudomonas syringae*, HopZ1a, Remorin, PBS1

**\*Correspondence:** Frederik Börnke, Plant Metabolism Group, Leibniz-Institute of Vegetable and Ornamental Crops (IGZ), Theodor-Echtermeyer-Weg 1, 14979 Großbeeren, Germany  
boernke@igzev.de

1 **Abstract**

2

3 The plasma membrane is at the interface of plant-pathogen interactions and thus many bacterial type-  
4 III effector proteins (T3Es) target membrane-associated processes to interfere with immunity. The  
5 *Pseudomonas syringae* T3E is a host cell plasma membrane (PM)-localized effector protein that has  
6 several immunity associated host targets but also activates effector triggered immunity (ETI) in  
7 resistant backgrounds. Although HopZ1a has been shown to interfere with early defense signaling at  
8 the PM, no dedicated plasma membrane-associated HopZ1a target protein has been identified until  
9 now. We show here, that HopZ1a interacts with the PM-associated remorin protein NbREM4 from  
10 *Nicotiana benthamiana* in several independent assays. NbREM4 re-localizes to membrane sub-  
11 domains after treatment with the bacterial elicitor flg22 and transient overexpression of NbREM4 in *N.*  
12 *benthamiana* induces the expression of a subset of defense related genes. We can further show that  
13 NbREM4 interacts with the immune-related receptor-like cytoplasmic kinase PBS1 and is  
14 phosphorylated by PBS1 on several residues *in vitro*. Thus, we conclude that NbREM4 is associated  
15 with early defense signaling at the PM. The possible relevance of the HopZ1a/NbREM4 interaction for  
16 HopZ1a virulence and avirulence functions is discussed.

17

## 1 Introduction

2

3 Plants possess a sophisticated and multi-layered immune system that generally prevents infection by  
4 potential pathogens (Jones and Dangl, 2006; Dodds and Rathjen, 2010). This type of resistance is  
5 usually based on the recognition of conserved microbe-associated molecular patterns (MAMPs) by  
6 plant cell surface localized pattern recognition receptors (PRRs), which upon activation trigger a suite  
7 of defense responses collectively preventing ingress of invading pathogens and leading to so called  
8 pattern triggered immunity (PTI) (Macho and Zipfel, 2015). However, adapted pathogens have evolved  
9 virulence strategies to overcome plant defense and to cause disease in a given host species. The  
10 injection of type III effector (T3E) proteins into the host cell is an efficient mechanism employed by  
11 many Gram-negative bacterial pathogens to suppress plant immunity and to promote disease  
12 development (Büttner, 2016; Khan et al., 2018a). T3Es have diverse biochemical activities to interfere  
13 with host cellular processes including proteases, acetyltransferases, E3-ubiquitin ligases,  
14 phosphatases and protein kinases to name just a few. Host targets of T3Es include signaling proteins,  
15 transcriptional regulators, the protein processing machinery as well as metabolic enzymes with a  
16 majority of targets involved in plant immunity (Büttner, 2016; Khan et al., 2018a). Typically, a suite of  
17 20 – 40 T3Es are translocated from a given bacterium into the host cell that collectively dampen the  
18 PTI response below a threshold allowing for bacterial multiplication and disease progression during so  
19 called effector triggered susceptibility (ETS) (Jones and Dangl, 2006).

20 As a response, plants have evolved the ability to either directly or indirectly recognize specific effector  
21 proteins through resistance proteins, a class of intracellular receptor proteins that typically contain  
22 nucleotide-binding domains (NB) and leucine rich repeats (LRRs). Effector recognition by NB-LRR  
23 proteins results in an accelerated and amplified PTI response and in most cases leads to localized cell  
24 death at the site of infection termed hypersensitive response (HR) and eventually inducing effector-  
25 triggered immunity (Dodds and Rathjen, 2010; Cesari, 2018).

26 The T3E HopZ1a from *Pseudomonas syringae* pv *syringae* A2 strain is a member of the widely  
27 distributed YopJ superfamily of cysteine proteases/acetyltransferases produced by both plant and  
28 animal bacterial pathogens (Lewis et al., 2011). It is a low specificity T3E that has several distinct  
29 molecular targets in different plant species (Khan et al., 2018a). HopZ1a possess acetyltransferase  
30 activity and has been shown to acetylate tubulin which disrupts the plant cytoskeletal network,  
31 resulting in breakdown of cellular trafficking (Lee et al., 2012a). In soybean, HopZ1a has been  
32 demonstrated to interact with the isoflavone biosynthesis enzyme 2-hydroxyisoflavanone dehydratase  
33 (GmHID1). Binding of HopZ1a promotes GmHID1 degradation and subsequently increases  
34 susceptibility of soybean to *P. syringae* by decreasing the capacity of the host to synthesize the  
35 phytoalexin daidzein (Zhou et al., 2011). Other host targets of HopZ1a include jasmonate ZIM-domain  
36 (JAZ) proteins, which negatively regulate the expression of jasmonic acid (JA)-responsive genes.  
37 Acetylation of JAZ proteins by HopZ1a mediates their degradation and thus activates JA signaling  
38 (Jiang et al., 2013). Activation of JA-signaling antagonizes salicylic acid (SA)-mediated defense  
39 responses which are required for immunity against hemibiotrophic pathogens, such *P. syringae*  
40 (Zheng et al., 2012).

1 Transgenic expression of HopZ1a in Arabidopsis has been shown to suppress several outputs of PTI  
2 such as the production of reactive oxygen species (ROS) and the activation of MAP-kinase signaling  
3 (Lewis et al., 2014). These effects are not well explained by the current known HopZ1a target proteins  
4 and thus additional targets might exist.

5 HopZ1a has been shown to trigger an HR in *Arabidopsis thaliana* accession Columbia-0 (Col-0), rice,  
6 certain soybean genotypes, and *Nicotiana benthamiana* (Ma et al., 2006). In Arabidopsis, HopZ1a  
7 recognition depends on the NB-LRR protein ZAR1 (HOPZ-ACTIVATED RESISTANCE1) and the  
8 ZED1 (HOPZ-ETI-DEFICIENT1) pseudokinase (Lewis et al., 2010; Lewis et al., 2013). ZED1 itself  
9 does not possess kinase activity and the current model suggests that it interacts with ZAR1 and  
10 HopZ1a and is acetylated by HopZ1a, which is hypothesized to trigger the activation of ZAR1 (Lewis  
11 et al., 2013). Thus, ZED1 appears to be a decoy guarded by ZAR1 and senses the activity of HopZ1a  
12 in the plant cell. Recent evidence suggests that in Arabidopsis ZAR1 also recognizes the  
13 *Xanthomonas campestris* T3E AvrAC, requiring the ZED1-related kinase ZRK1 instead of ZED1, as  
14 well as the *Pseudomonas syringae* T3E HopF2a in a ZRK3-dependent manner (Wang et al., 2015;  
15 Seto et al., 2017). A ZAR1 orthologue was recently identified in *N. benthamiana* (Baudin et al., 2017);  
16 however, opposite to earlier observations (Ma et al., 2006), HopZ1a only triggered a ZAR1 dependent  
17 HR in *N. benthamiana* upon co-expression with Arabidopsis ZED1 (Baudin et al., 2017). Thus, it is  
18 currently unclear what the endogenous guardee of ZAR1 in *N. benthamiana* is and if this is a decoy to  
19 lure HopZ1a into the ZAR1 immune complex.

20 In this study, we identified a remorin protein NbREM4 as a novel interaction partner of HopZ1a in *N.*  
21 *benthamiana* and further studies suggest that NbREM4 interacts with the immune related RLCK  
22 PBS1. Biochemical studies suggest that PBS1 can specifically phosphorylate NbREM4 *in vitro* on  
23 several residues. A possible role of the PBS1/NbREM4 interaction module as a target for HopZ1a is  
24 discussed. We further show that HopZ1a triggers a ZAR1-dependent HR in *N. benthamiana*  
25 suggesting that a HopZ1a targets a thus far unknown guardee of ZAR1 in this plant species.

26

## 27 **Results**

28

29 *HopZ1a interacts with a remorin from Nicotiana benthamiana in yeast*

30

31 HopZ1a is known to have multiple target proteins in different plant species (Zhou et al., 2011; Lee et  
32 al., 2012b; Jiang et al., 2013). However, the target proteins known to date do not explain all HopZ1a-  
33 related phenotypes observed upon expression of the effector in plants (Lewis et al., 2014). Thus,  
34 HopZ1a is likely to possess additional, yet unidentified target proteins. In order to further understand  
35 HopZ1a function, we screened for proteins that interact with HopZ1a using a yeast two-hybrid (Y2H)  
36 cDNA library from tobacco (*Nicotiana tabacum*). This repeatedly identified different clones of a cDNA  
37 encoding a protein with high similarity to remorin-like proteins from different plant species (Genbank  
38 accession number XP\_016479648.1), which we tentatively named NtRemorin. Remorins are plant-  
39 specific plasma membrane proteins, which may act as molecular scaffolds regulating signal  
40 transduction (Jarsch and Ott, 2011). One clone isolated during the screening that comprised the entire  
41 predicted NtRemorin ORF, except the start methionine, was used in a direct Y2H assay with HopZ1a.

1 Reporter gene activation confirms the interaction between the two proteins in yeast (Figure 1) We  
2 sought to use *Nicotiana benthamiana* for further functional analysis of the HopZ1a/remorin interaction  
3 because of its amenability to molecular and cell biology manipulations (Goodin et al., 2008). A  
4 homology search identified a remorin-like protein with high similarity (90%) to NtRemorin encoded by  
5 the *N. benthamiana* genome (Niben101Scf00735g05005.1), tentatively dubbed NbRemorin  
6 (Supplementary Figure S1). A direct Y2H interaction assay suggests that also NbRemorin binds to  
7 HopZ1a in yeast and thus is suitable for a functional analysis of the interaction (Figure 1). In  
8 Arabidopsis, the remorin family consists of 16 members which fall into six different groups (Raffaele et  
9 al., 2007). When grouped into a phylogenetic tree of the Arabidopsis remorin protein family,  
10 NbRemorin most closely associates with group 4 remorins and thus will be referred to as NbREM4  
11 from now on (Supplementary Figure S2). In order to investigate whether HopZ1a can also interact with  
12 other members of the *N. benthamiana* remorin family, two additional remorin isoforms, one from group  
13 1 and one from group 6, were tested for their ability to bind HopZ1a in yeast. A direct Y2H assay  
14 suggests no interaction of HopZ1a with NbRem1 or NbRem6 (Supplementary Figure S3). Thus,  
15 although binding of HopZ1a to other remorins not tested in this experiment cannot be excluded, there  
16 appears to be at least some specificity of HopZ1a to interact with NbREM4.

17 The NbREM4 polypeptide comprises 296 amino acids and has a predicted molecular weight of 33  
18 kDa. It features the typical domain structure found in remorins from different plant species (Raffaele et  
19 al., 2007) with a conserved C-terminal signature region (Pfam domain Remorin\_C; PF03763) that  
20 encodes a predicted coiled-coil motif and a putative membrane-anchoring motif and a variable N-  
21 terminal part (Figure S1). In order to map the region of HopZ1a binding to NbREM4, we co-  
22 transformed constructs comprising the NbREM4 N-terminal region or the C-terminal region of the  
23 protein together with HopZ1a in a yeast reporter strain. As shown in Figure 2, the conserved NbREM4  
24 C-terminus is necessary and sufficient for the interaction with HopZ1a. However, the apparently  
25 weaker interaction indicates that the N-terminal part of the protein likely also contributes to HopZ1a  
26 binding.

27 Remorins have been reported to form hetero and homo-oligomers and thus we tested the ability of  
28 NbREM4 to self-interact or to bind to other remorin isoforms. A direct Y2H assay indicates that indeed  
29 NbREM4 is able to form homomers in yeast but does not bind to two other remorin isoforms tested  
30 (Supplementary Figure S4). To confirm this interaction in planta, we performed BiFC using *N.*  
31 *benthamiana* leaves, where a robust fluorescence signal indicated oligomerization of NbREM4 at the  
32 PM of infiltrated tobacco epidermal cells (Supplementary Figure S4).

33

34 *HopZ1a* interacts with *NbREM4* in planta and in vitro

35

36 Next, the subcellular localization of both protein partners *in planta* was examined to determine whether  
37 co-localization as a prerequisite of *in vivo* interaction can be observed. The green fluorescent protein  
38 (GFP) was fused to the C-terminus of HopZ1<sup>C/A</sup> carrying a cysteine to alanine substitution at position  
39 C216 within the conserved catalytic triad of the effector, and the fusion protein was expressed in  
40 leaves of *N. benthamiana* using *Agrobacterium*-infiltration. The HopZ1a<sup>C/A</sup> variant was used for the  
41 experiments to prevent elicitation of a hypersensitive response in *N. benthamiana* that has been

1 shown to depend on its catalytic activity (Ma et al., 2006). In accordance with previous findings and  
2 the presence of a myristoylation motif at glycine 2 of the HopZ1a (Lewis et al., 2008), HopZ1a<sup>G/A</sup>-GFP  
3 expression generated a fluorescence signal in the periphery of the cell, indicating plasma membrane  
4 localization of the fusion protein (Figure 3A). In a similar approach NbREM4 was tagged at the N-  
5 terminus with GFP and transient expression of the GFP-NtRem4 protein in *N. benthamiana* yielded a  
6 fluorescence signal resembling that of a PM associated protein (Figure 3B). To further corroborate this  
7 finding, membranes of GFP-NbREM4 expressing cells were labelled with the fluorescence dye FM4-  
8 64 and microscopic analysis revealed substantial overlap between the GFP and the FM4-64  
9 fluorescence signal, confirming PM localization of NbREM4 (Figure 3B). Thus, both HopZ1a and  
10 NbREM4 localize to the plant cell PM and therefore could interact *in vivo*.

11 To verify the interaction of HopZ1a and NbREM4 *in planta*, bimolecular fluorescence complementation  
12 (BiFC) assays were performed in *N. benthamiana* using transient expression via *Agrobacteria*. Strong  
13 YFP fluorescence was observed when a combination of HopZ1a-Venus<sup>C</sup> with Venus<sup>N</sup>-NbREM4 was  
14 expressed, demonstrating that both proteins interact inside plant cells (Figure 4A). In accordance with  
15 PM localization of HopZ1a as well as of NbREM4, the YFP signal appeared to be confined to the PM  
16 as no fluorescence surrounding the chloroplasts could be detected which would be indicative for a  
17 cytosolic localization of the interaction (Figure 4A). Negative controls including unrelated proteins  
18 yielded no fluorescence signal, indicating the specificity of the interaction (Supplementary Figure S5).  
19 In addition, mutation of the myristoylation motif at glycine 2 of HopZ1a abolished the interaction with  
20 NbREM4 (Figure 4A), which is in accordance with a release of the HopZ1<sup>G/A</sup> protein from the  
21 plasmamembrane (Lewis et al., 2008).

22 To exclude that the interaction between HopZ1a and NbREM4 is mediated by a third eukaryotic  
23 protein an *in vitro* pull-down assay was performed. To this end, recombinant glutathione S-transferase  
24 (GST) tagged HopZ1a was incubated with maltose-binding protein (MBP) tagged NbREM4. Protein  
25 complexes were pulled-down using amylose resin which binds MBP and precipitated proteins were  
26 subsequently detected using either anti-GST or anti-MBP antibodies. A western blot revealed that  
27 GST-HopZ1a was pulled down together with MBP-NbREM4, demonstrating a direct physical  
28 interaction of both proteins which does not require additional factors (Figure 4B). MBP alone was not  
29 able to pull down GST-HopZ1a indicating specificity of the *in vitro* interaction (Figure 4B).

30 Taken together, these data suggest that the *Pseudomonas* T3E HopZ1a directly interacts with the  
31 remorin NbREM4 at the PM of plant cells.

32

### 33 *Overexpression of NbREM4 affects defense gene expression*

34

35 Remorins from different plant species have been associated with plant defense responses (Jarsch and  
36 Ott, 2011; Bozkurt et al., 2014; Son et al., 2014; Fu et al., 2018). Given the fact that the majority of  
37 *Pseudomonas* T3Es target immunity related functions inside the host cell (Büttner, 2016; Khan et al.,  
38 2018a), the interaction of NbREM4 with HopZ1a points towards an involvement of NbREM4 in some  
39 sort of plant defense response. In order to provide first insights into an *in planta* function of NbREM4 a  
40 GFP-tagged version of the protein under the control of the constitutive CaMV35S promoter was  
41 transiently expressed in leaves of *N. benthamiana* using *Agrobacterium*-infiltration. A phenotypic



1 inspection of GFP-NbREM4 expressing leaves revealed that overexpression of the remorin protein led  
2 to the development of chloroses in infiltrated areas 3 dpi (days post infiltration) which progressed into  
3 tissue collapse until 6 dpi (Figure 5A). An anti-GFP western blot suggests that GFP-NbREM4 protein  
4 levels are highest 1 and 2 dpi and decline to almost undetectable levels until 6 dpi, which is in  
5 accordance with leaf phenotype development (Figure 5C). To quantitatively assess tissue damage  
6 upon GFP-NbREM4 expression, electrolyte leakage from infiltrated leaves was measured at different  
7 time points. Ion leakage was significantly increased in GFP-NbREM4 expressing leaves compared to  
8 leaves transformed with the empty vector from 3 dpi onwards (Figure 5B), indicating that GFP-  
9 NbREM4 expression leads to membrane damage. To monitor GFP-NbREM4 triggered molecular  
10 changes expression of selected defense related genes was measured 24 dpi and 48 hpi, before any  
11 phenotypic changes became visible. The genes *Pti5*, *Acre31* and *Gras2* have been demonstrated  
12 previously to be responsive to both a nonadapted bacterium and a semi-virulent bacterial pathogen in  
13 *N. benthamiana* and thus have been implicated in PTI (Nguyen et al., 2010). Expression of *Pti5* and  
14 *Acre31* was induced in GFP-NbREM4 expressing plants at 48 hpi (Figure 6). For *Gras2*, expression  
15 was higher at 24 hpi compared to 48hpi, whereas *Acre31* expression was maintained at similar levels  
16 between the two time points. Although not significantly upregulated, *Gras2* expression was increased  
17 by trend at 48 hpi in GFP-NbREM4 infiltrated leaves (Figure 6). In addition, GFP-NbREM4  
18 overexpression led to the significant up-regulation of the pathogenesis related genes *Hin1* and *Hsr201*  
19 (Figure 6). Taken together, transient overexpression of NbREM4 in leaves of *N. benthamiana* induces  
20 expression of immunity related genes 48 hpi and leads to tissue collapse at later time points.

21

#### 22 *NbREM4* interacts with the immune related kinase *PBS1*

23

24 It has been hypothesized that certain remorin isoforms play a dynamic role as scaffold proteins in  
25 plant innate immune signaling (Benschop et al., 2007; Jarsch and Ott, 2011). Thus, we sought to  
26 identify plant proteins capable of interacting with NbREM4 which could provide further information  
27 about NbREM4 function. To this end, a Y2H screening of a tobacco cDNA library using NbREM4 as a  
28 bait was conducted. This identified a PBS1-like protein as a potential NbREM4 interactor in yeast,  
29 which encodes a receptor-like cytoplasmic kinase (RLCK). PBS1-like proteins belong to subfamily VII  
30 of RLCKs that include the founding member *avrPphB*-susceptible 1 (PBS1) (Shao et al., 2003) and the  
31 *Botrytis*-induced kinase 1 (BIK1) (Laluk et al., 2011) as well as other PBS-like (PBL) proteins  
32 implicated in plant immune signaling (Lin et al., 2013; Rao et al., 2018).

33 We isolated a full-length sequence of the NbREM4 interacting PBS-like from *N. benthamiana*  
34 (Niben101Scf02086g00004.1). The protein comprises 390 amino acids and shares 71 % similarity  
35 with PBS1 from Arabidopsis (Supplementary Figure S6). Just as AtPBS1, the *N. benthamiana* PBS-  
36 like protein carries a putative myristoylation signal at its N-terminus which likely mediates PM  
37 association and contains a single catalytic kinase domain. Based on these analogies we termed the *N.*  
38 *benthamiana* PBS-like protein NbPBS1. A direct Y2H assay revealed that full-length NbPBS1 as well  
39 as Arabidopsis (At)PBS1 is capable of interacting with NbREM4 in yeast (Figure 7A). In order to  
40 investigate whether NbREM4 specifically interacts with PBS1 or also with other member of the PBL  
41 family we tested binding of the remorin to other RLCKs from Arabidopsis. As shown in Figure S7,

1 NbREM4 interacted with AtPBS1 but not with any other RLCK tested, indicating a certain degree of  
2 specificity in the interaction of both proteins.

3 To assess the extent of co-localization of NbREM4 and PBS1 inside plant cells, NbREM4 N-terminally  
4 tagged with the red fluorescence protein (RFP) and NbPBS1-GFP were co-expressed in leaves of *N.*  
5 *benthamiana* using *Agrobacterium*-infiltration. Confocal imaging 2 dpi revealed that green as well as  
6 red fluorescence aligned with the region representing the PM and both fluorescence signals displayed  
7 substantial overlap indicative for co-localization of both proteins (Figure 7B). We applied the BiFC  
8 approach to analyse whether the observed Y2H interactions occur in living plant tissues/cells.  
9 Transient co-expression of NbPBS1-Venus<sup>N</sup> together with Venus<sup>C</sup>-NbREM4 induced a strong  
10 fluorescence signal along the PM not engulfing the chloroplasts (Figure 7C). Control experiments  
11 indicate that the BiFC signal is specific (Supplementary Figure S5). In summary, these experiments  
12 suggest that NbREM4 specifically interacts with PBS1 at the PM of plant cells.

13

#### 14 *PBS1 phosphorylates NbREM4 in vitro*

15

16 Arabidopsis PBS1 belongs to subgroup VII of RLCK of which several members have been shown to  
17 play redundant roles in mediating PTI responses upon phosphorylation by upstream PRRs (Yamada  
18 et al., 2016; Bi et al., 2018; Rao et al., 2018). Based on protein mobility shifts on SDS-PAGE, PBS1  
19 has been shown to undergo flg22 dependent phosphorylation in Arabidopsis protoplasts, suggesting  
20 an activation of the kinase during PTI signaling (Lu et al., 2010; Zhang et al., 2010). However,  
21 downstream phosphorylation targets of PBS1 have so far not been identified. Given that PBS1  
22 interacts with NbREM4 and that remorins have been described as phosphoproteins (Reymond et al.,  
23 1996; Benschop et al., 2007; Marin and Ott, 2012; Toth et al., 2012), we explored the possibility of  
24 NbREM4 being a phosphorylation substrate of PBS1. To this end both proteins were recombinantly  
25 produced in *E. coli* and subjected to an *in vitro* phosphorylation assay using radiolabeled ATP. As  
26 indicated by their autophosphorylation activity both NbPBS1 and AtPBS1 recombinant proteins  
27 appeared to be active *in vitro*. Under our experimental conditions AtPBS1 reproducibly produced a  
28 stronger autophosphorylation signal than NbPBS1, indicating higher activity of the recombinant protein  
29 from Arabidopsis. Thus, we used AtPBS1 for the *in vitro* phosphorylation of NbREM4. Only when  
30 MBP-AtPBS1 and MBP-NbREM4 were present in the same assay mix an additional prominent signal  
31 appeared that corresponds to the MBP-NbREM4 protein band, indicating phosphorylation of NbREM4  
32 by AtPBS1 *in vitro* (Figure 8A). The addition of MBP alone produced no additional signal,  
33 demonstrating phosphorylation of the NbREM4 portion within the MBP-NbREM4 fusion protein.

34 In order to map NbREM4 phosphorylation sites, phosphorylation reactions were repeated under non-  
35 radioactive conditions and protein from gel excised MBP-NbREM4 bands was subjected to MALDI-  
36 TOF MS/MS analysis. This identified a singly phosphorylated peptide comprising the amino acids 64 –  
37 87 of the NbRemorin4 protein (relative to the start M of the native NbREM4 protein, Figure 8B). The  
38 peptide contained several serine and threonine residues that potentially could serve as  
39 phosphoacceptor sites. Fragmentation analysis suggested phosphorylation at one of the N-terminal  
40 residues of the phosphopeptide located within the double serine motif S64 (62 % probability) or S65  
41 (35 % probability). We created an MBP-NbREM4<sup>S64/65A</sup> variant that carries a serine to alanine



1 substitution at the potential phosphorylation site and used the purified recombinant protein in an *in*  
2 *vitro* kinase assay with AtPBS1. This still yielded a signal corresponding to MBP-NbREM4<sup>S64/65A</sup>,  
3 indicating that the serine to alanine substitution at this position did not abolish phosphorylation (Figure  
4 8C). However, a densitometric analysis of signal intensity revealed a reduction of phosphorylation by  
5 app. 30 % (Figure 8D). This suggests that phosphorylation of NbREM4 by AtPBS1 at either S64 or  
6 S65 occurs but that the protein contains additional phosphorylation sites that escaped the MALDI-TOF  
7 MS/MS analysis. The presence of additional phosphosites in NbREM4 is in accordance with an *in*  
8 *silico* phosphosite prediction using NetPhos3.1 (<http://www.cbs.dtu.dk/services/NetPhos/>) which  
9 predicts at least 28 putative serine or threonine phosphorylation sites with high confidence  
10 (Supplementary Figure S8).

11 Taken together, these data suggest that PBS1 phosphorylates NbREM4 at multiple sites *in vitro* and  
12 thus opens the possibility that NbREM4 is also a phosphorylation target of PBS1 *in planta*.

13

#### 14 *NbREM4 is not acetylated by HopZ1a in vitro*

15

16 HopZ1a possess acetyltransferase activity and acetylation of target proteins has been associated with  
17 virulence and avirulence functions of the effector (Lee et al., 2012b; Jiang et al., 2013; Lewis et al.,  
18 2013). In order to investigate whether the HopZ1a interaction partner NbREM4 also serves as an  
19 acetylation target an *in vitro* acetylation assay was conducted using *E. coli* produced proteins. Purified  
20 recombinant proteins were incubated with <sup>14</sup>C-acetyl-coenzyme A and 100 nM inositol-  
21 hexakisphosphate (IP6) for 1 h at 30°C. Subsequently the proteins were separated by SDS-PAGE  
22 analysis followed by autoradiography. IP6 is a eukaryotic cofactor that stimulates the acetyltransferase  
23 activity of effectors in the YopJ family, including HopZ1a (Lee et al., 2012b).

24 Auto-acetylation of GST-HopZ1a was readily detected, indicating enzymatic activity of the  
25 recombinant protein (Supplementary Figure S9). However, no clear signs of an acetylation of the  
26 MBP-NbREM4 band could be detected suggesting that the remorin does not constitute an acetylation  
27 target of HopZ1a *in vitro*.

28

#### 29 *NbREM4 relocates to PM microdomains after flg22 treatment*

30

31 Previous reports have localized individual remorin isoforms from different plant species to PM  
32 membrane microdomains either in a constitutive or stimulus dependent manner (Raffaele et al., 2009;  
33 Lefebvre et al., 2010; Demir et al., 2013; Jarsch et al., 2014). Transient expression of GFP-NbREM4  
34 in leaves of *N. benthamiana* did not reveal clear signs of localization to distinct membrane subdomains  
35 (Figure 9). Given the fact that NbREM4 could potentially be involved in PAMP signaling at the PM we  
36 investigated whether flg22 treatment would have any influence on GFP-NbREM4 PM localization.  
37 Indeed, we could observe that one hour after treatment with flg22 GFP-NbREM4 fluorescence was  
38 increasingly found in distinct and immobile membrane microdomains that were distributed over the  
39 entire inner PM leaflet of treated cells (Figure 9).

40

41

1 *Possible role of NbREM4 in HopZ1a dependent ETI*

2

3 HopZ1a has been shown to elicit an HR in *N. benthamiana*, indicative for its recognition through an R  
4 protein (Ma et al., 2006). However, Baudin et al. (2017) recently found that inducible expression of  
5 HopZ1a in *N. benthamiana* did not induce an HR. In Arabidopsis, HopZ1a recognition requires the  
6 canonical CC-type NLR protein ZAR1 (HOPZ-ACTIVATED RESISTANCE1) (Lewis et al., 2010).  
7 Detection of HopZ1a by AtZAR1 requires AtZED1 (HOPZ-ETI-DEFICIENT1), a receptor-like  
8 cytoplasmic kinase (RLCK) belonging to the RLCK clade XII-2 family that acts as decoy guarded by  
9 AtZAR1 to senses the activity of HopZ1a (Lewis et al., 2013). Given the discrepancy in the observed  
10 HopZ1a overexpression phenotypes, we initiated a set of experiments to further investigate a HopZ1a  
11 dependent HR in *N. benthamiana* and explore the possible involvement of NbREM4 and PBS1 in this  
12 process. First, we assessed whether under our experimental conditions expression of HopZ1a leads  
13 to HR development in *N. benthamiana*. To this end, HopZ1a, HopZ1a<sup>C/A</sup> and the *Xanthomonas*  
14 *campestris* pv. *vesicatoria* T3E AvrRxx were transiently expressed in *N. benthamiana* leaves  
15 alongside with an empty vector (EV) control. As compared to the EV control and the catalytically  
16 inactive HopZ1a<sup>C/A</sup> variant, HopZ1a infiltrated areas showed clear signs of cell death at 2 dpi that were  
17 even more prominent than those triggered by AvrRxx (Figure 10A). In accordance with the observed  
18 leaf phenotype, ion leakage from HopZ1a infiltrated tissue was significantly increased at 2 dpi while  
19 expression of HopZ1a<sup>C/A</sup> did not increase electrolyte efflux (Figure 10B). A western blot analysis  
20 confirmed expression of all proteins tested (Figure 10C). Thus, transient expression using  
21 *Agrobacterium*-infiltration triggers HR-like symptoms and membrane damage in *N. benthamiana*. In  
22 order to investigate whether the observed HopZ1a-dependent phenotype would require the R protein  
23 ZAR1, we cloned a fragment of the *N. benthamiana* ZAR1 orthologue (Baudin et al., 2017) into a  
24 vector for virus-induced gene silencing (VIGS). Strong down-regulation of *NbZAR1* could be confirmed  
25 in *N. benthamiana* plants 2 weeks after infiltration with the VIGS vectors as compared to the *GFP*-  
26 VIGS (*GFP*-VIGS) control (Figure 11A). Transient expression of HopZ1a in *GFP*-VIGS plants led to  
27 the previously observed HR symptoms at 2 dpi while HopZ1aC/A did not cause phenotypic changes  
28 (Figure 11B). In contrast, HopZ1a expression in *NbZAR1*-VIGS plants did not yield visible signs of HR  
29 at 2 dpi (Figure 11B). Protein expression in all tissues analyzed was confirmed by western blotting  
30 (Figure 11C). Ion leakage measurement revealed that HopZ1a did not cause a significant increase in  
31 membrane damage in *NbZAR1*-VIGS plants as opposed to the *GFP*-VIGS control (Figure 11D). Taken  
32 together, the data suggest that similar to the situation in Arabidopsis (Lewis et al., 2010), the HopZ1a-  
33 dependent HR in *N. benthamiana* depends on its recognition by NbZAR1.

34 We next sought to explore whether the HopZ1a interaction partner NbREM4 contributes to HopZ1a-  
35 associated HR in *N. benthamiana*. Therefore, we used the VIGS system to repress NbREM4  
36 expression and subsequently expressed HopZ1a in NbREM4-silenced plants. NbREM4 expression  
37 was drastically reduced in NbREM4-VIGS plants, indicating efficient silencing (Supplementary Figure  
38 S10A). However, *NbREM4*-VIGS plants displayed similar HR symptoms and electrolyte leakage upon  
39 HopZ1a expression as the *GFP*-VIGS control (Supplementary Figure S10), suggesting that down-  
40 regulation of NbREM4 does not affect the ability of HopZ1a to elicit an HR.

41

## 1 Discussion

2

3 During infection, bacterial T3Es translocated by the type III secretion system play a central role in the  
4 manipulation of the host cellular machinery in favor of the pathogen. In general, these T3Es are  
5 essential for pathogen virulence by interfering with plant processes involved in defense responses  
6 (Jones and Dangl, 2006). In order to interact with the correct host target and exert their function, T3Es  
7 often show a specific localization within the host cell (Hicks and Galán, 2013). A recent survey  
8 suggests that in case of *P. syringae* more than half of the T3Es characterized to date target host  
9 proteins that localize to the host cell's plasma membrane (Khan et al., 2018a). This highlights the  
10 importance of the PM as the interface of pathogen recognition and initiation of immunity (Hoefle and  
11 Hückelhoven, 2008). Accordingly, a number of effector proteins carry lipid modifications such as  
12 acylation (also called palmitoylation), myristoylation, and prenylation that enable host membrane  
13 association after translocation into the cytosol (Hicks and Galán, 2013). The *P. syringae* T3E HopZ1a  
14 is an acetyltransferase that requires N-terminal myristoylation for PM targeting and this modification is  
15 required for its virulence and avirulence function in Arabidopsis and soybean (Lewis et al., 2008).  
16 Several distinct molecular targets of HopZ1a have been identified not all of which are known to locate  
17 to the PM (Zhou et al., 2011; Lee et al., 2012b; Jiang et al., 2013). However, HopZ1a has been shown  
18 to interfere with PM and cell wall-associated defense such as callose deposition, the ROS burst and  
19 MAP kinase activation (Lee et al., 2012b; Lewis et al., 2014). This is partially explained by its ability to  
20 cause microtubule destruction through acetylation of tubulin (Lee et al., 2012b).

21 Here, we identified the remorin protein NbREM4 from *N. benthamiana* as a novel interaction partner of  
22 HopZ1a in plants. The obtained evidence suggests that the HopZ1a NbREM4 interaction occurs at the  
23 PM and does not require additional proteins. Remorins are plant specific proteins with multiple roles in  
24 plant microbe interactions, including those with viruses (Raffaele et al., 2009; Perraki et al., 2014; Son  
25 et al., 2014; Fu et al., 2018), oomycetes (Bozkurt et al., 2014), and bacteria (Lefebvre et al., 2010;  
26 Toth et al., 2012; Liang et al., 2018). Interestingly, the Arabidopsis remorins AtREM1.2 and AtREM1.3  
27 have been identified to interact with the Pseudomonas T3E HopF2 in vivo by two independent  
28 methods (Hurley et al., 2014; Khan et al., 2018b). Although the functional significance of this  
29 interaction is currently unknown it might point to broader role of remorins in T3E function in plants. All  
30 described remorins associate with the PM in dynamic microdomains known as membrane rafts  
31 (Jarsch and Ott, 2011; Jarsch et al., 2014; Gronnier et al., 2017). In mammals and plants, these rafts  
32 have been suggested to constitute assembly platforms for signal transduction, pathogen infection, and  
33 other processes (Simons and Gerl, 2010; Simon-Plas et al., 2011). It has been shown that *Medicago*  
34 *truncatula* nodulation-induced remorin MtSYMREM1 interacts with at least three RLKs NFP, LYK3,  
35 and DMI that are essential for root nodule symbiosis (Lefebvre et al., 2010). Infection dependent  
36 induction of MtSYMREM1 results in recruitment of ligand activated LYK3 and its stabilization within  
37 membrane subdomains to prevent endocytosis of the receptor, a function required for successful  
38 rhizobial infection (Liang et al., 2018). We observed relocalization of GFP-NbREM4 to distinct PM  
39 subdomains resembling lipid rafts after treatment with flg22. A similar redistribution into specific PM  
40 subdomains upon elicitation with flg22 has also been observed for the flg22 receptor FLS2 (Keinath et  
41 al., 2010). This supports a model in which PAMP-induced signaling may require defined membrane

1 domains that provide physical rafts for receptor-scaffold and other protein-protein interactions possibly  
2 involving NbREM4. Phosphorylation could be one mechanism which regulates membrane  
3 sublocalization and/or protein-protein interactions of NbREM4. Many remorins have been shown to be  
4 phosphorylated in a constitutive or stimulus dependent manner (Jarsch and Ott, 2011). In a large  
5 scale proteomic approach to identify differentially phosphorylated proteins involved in early PAMP,  
6 AtREM1.3 was shown to be phosphorylated in an flg-22 dependent manner while other remorin  
7 isoforms displayed constitutive phosphorylation (Benschop et al., 2007). The potato remorin  
8 StREM1.3 is differentially phosphorylated by a PM associated protein kinase upon the perception of  
9 polygalacturonic acid (Reymond et al., 1996; Jarsch and Ott, 2011). Generally, phosphorylation of  
10 remorins appears to be restricted to serine and threonine residues that are exclusively located within  
11 the lowly conserved N-terminal region of the protein (Marín and Ott, 2012). The N-terminal domain of  
12 remorins is intrinsically disordered and that phosphorylation within this region has the capacity to alter  
13 the interaction of remorins with other proteins (Marín et al., 2012). We could show that NbREM4 is  
14 phosphorylated on several residues, including serine 64 within the unconserved N-terminal domain, by  
15 the PM localized RLCK PBS1 *in vitro*. PBS1 belongs to subfamily VII of RLCKs whose members have  
16 been implicated in several aspects of PTI, including activation of MAP signaling, generation of ROS,  
17 and transcriptional reprogramming (Lin et al., 2013; Bi et al., 2018; Lal et al., 2018; Rao et al., 2018).  
18 The role of PBS1 in PTI signaling is not entirely clear. It has been shown that flg22 treatment induces  
19 phosphorylation of PBS1 in Arabidopsis as well as in wheat (Lu et al., 2010; Sun et al., 2017).  
20 However, genetic studies indicate that at least in Arabidopsis PBS1 only plays a minor role PTI  
21 signaling as compared to other members of the RLCK VII family (Zhang et al., 2010). Whether PBS1  
22 in other plants is more important to trigger PAMP induced defense responses is currently unknown.  
23 NbREM4 does not seem to interact with other tested members of the RLCK VII clade in yeast than  
24 PBS1. However, this does not exclude phosphorylation of NbREM4 by other kinases *in vivo*.  
25 Phosphorylation of NbREM4 by an upstream RLCK, like PBS1, could then lead to activation of  
26 downstream defense responses for instance by altering the ability of NbREM4 to interact with other  
27 proteins and thereby affecting their activity. Along that line, we could observe that transient  
28 overexpression of NbREM4 in leaves of *N. benthamiana* led to the development of leaf chlorosis  
29 associated with membrane damage and the induction of defense related genes. Thus, overexpression  
30 of NbREM4 might dominantly activate downstream defense responses. However, we currently cannot  
31 exclude a general cytotoxic effect of NbREM4 through interference with other vital cellular processes.  
32 The unequivocal demonstration that NbREM4 phosphorylation is required for relocalization of the  
33 protein into membrane microdomains or that it alters protein-protein interactions of NbREM4  
34 downstream immune related targets requires further experimentation.  
35 The virulence function of HopZ1a has been associated with its acetyltransferase activity and  
36 acetylation of host target proteins by HopZ1a is thought to interfere with their function in immunity  
37 related processes (Zhou et al., 2011; Lee et al., 2012a; Jiang et al., 2013). The results of *in vitro*  
38 acetylation assays do not suggest acetylation of NbREM4 by HopZ1a and thus it is currently unknown  
39 whether NbREM4 constitutes a genuine effector target for HopZ1a or whether it might have some  
40 auxiliary function. Remorins have thus far not been described as target proteins for bacterial T3Es but  
41 given their extensive involvement in plant-microbial interactions interference with remorin function

1 could potentially have a wide impact on PTI related defense outputs. Alternatively, HopZ1a could use  
2 NbREM4 as an auxiliary factor that facilitates either the indirect interaction with other proteins or the  
3 localization to specific membrane subdomains related to HopZ1a function. RLCKs like PBS1 could  
4 constitute these indirect targets and future experiments have to investigate whether PBS1 or other  
5 NbREM4 interacting proteins are substrates for HopZ1a acetylation and hence whether interaction of  
6 HopZ1a with NbREM4 is related to the virulence function of the effector.

7 In Arabidopsis, HopZ1a is recognized by the NLR ZAR1 to trigger ETI. Recognition depends on the  
8 pseudokinase ZED1 which acts as a decoy for HopZ1a mediated acetylation to activate ZAR1 (Lewis  
9 et al., 2013). Recent evidence suggests that the ZAR1 immune pathway is largely conserved in *N.*  
10 *benthamiana* (Baudin et al., 2017). Our observation that transient expression of HopZ1a in *N.*  
11 *benthamiana* triggers an ETI response is in line with previous reports (Ma et al., 2006) but in contrast  
12 to a recent study by Baudin et al. (2017) who observed a HopZ1a dependent HR in *N. benthamiana*  
13 only upon coexpression of the effector with ZED1 from Arabidopsis. The discrepancy between these  
14 two observations is likely due to differences in the experimental setup. While in Ma et al. (2006) and  
15 the study described here a strong constitutive CaMV35S promoter was used to drive HopZ1a  
16 expression in *N. benthamiana* leaves, Baudin et al. (2017) used an inducible system that might lead to  
17 differences in expression kinetics and protein amounts of the effector and thus could affect the  
18 outcome of the overexpression. As previously observed (Baudin et al., 2017), silencing of ZAR1  
19 abolished the HopZ1a triggered HR in *N. benthamiana* confirming effector recognition by this NLR  
20 also in this species. Based on the current model of HopZ1a recognition by ZAR1 in Arabidopsis, this  
21 implies that HopZ1a likely interacts and modifies a protein that is guarded by ZAR1 in *N. benthamiana*.  
22 A ZED1 orthologue in *N. benthamiana* has so far not been characterized and thus potential guardees  
23 of NbZAR1 are currently unknown. Recent data suggest that ZAR1 in Arabidopsis interacts with  
24 multiple guardees beyond ZED1, including ZRK1 (ZED-related 1) leading to the recognition of AvrAC  
25 from *Xanthomonas campestris* pv. *campestris* (Wang et al., 2015) and ZRK3 required for the  
26 perception of HopF2a from *Pseudomonas syringae* (Seto et al., 2017). Thus, it is possible that in *N.*  
27 *benthamiana* ZAR1 guards various members of the RLCK family. In Arabidopsis, PBS1 is guarded by  
28 the NLR RPS5 which activates HR upon proteolytic cleavage of PBS1 by the *P. syringae* T3E  
29 AvrPphB (Shao et al., 2003), thus providing precedent for a role of PBS1 in ETI. Recognition of AvrAC  
30 in Arabidopsis requires PBS-like 2 (PBL2) in addition to ZRK1 and the current model suggests that  
31 ZAR1 forms a stable complex with ZRK1, which specifically recruits PBL2 when the latter is  
32 uridylylated by AvrAC to subsequently trigger ZAR1-mediated immunity (Wang et al., 2015). Thus,  
33 modification of PBL2 by AvrAC is indirectly recognized by the ZAR1/ZRK1 immune complex. Silencing  
34 of NbREM4 did not affect HopZ1a triggered HR in *N. benthamiana*, arguing against a direct or indirect  
35 involvement of this to protein in HopZ1a recognition.

36

37 In summary, the present study shows that HopZ1a directly interacts with NbREM4 in *N. benthamiana*  
38 and transient overexpression of NbREM4 point towards a role of this remorin in induced defense  
39 responses. This notion is corroborated by the finding that NbREM4 interacts and is phosphorylated by  
40 the immune related RLCK PBS1. Future studies have to clarify whether the interaction with HopZ1a  
41 interferes with this possible role of NbREM4 in defense. Virus-induced gene silencing studies indicate



1 that neither NbREM4 nor PBS1 play a role in HopZ1a triggered ETI in *N. benthamiana* favoring a role  
2 of these proteins as virulence targets for this T3E. The finding that HopZ1a triggers a ZAR1-  
3 dependent HR in *N. benthamiana* in absence of the Arabidopsis decoy protein ZED1 further extends  
4 on the observation concerning conservation of ZAR1-mediated HopZ1a recognition in this species  
5 (Baudin et al., 2017).

## 6 7 **Material and Methods**

### 8 9 *Plant material and growth conditions*

10  
11 Tobacco plants (*Nicotiana benthamiana*) were grown in soil in a climate chamber with daily watering,  
12 and subjected to a 16 h light/8 h dark cycle (25°C: 21°C) at 300  $\mu\text{mol m}^{-2} \text{s}^{-1}$  light and 75% relative  
13 humidity.

### 14 15 *Yeast Two-Hybrid Analysis*

16  
17 Yeast two-hybrid techniques were performed according to the yeast protocols handbook and the  
18 Matchmaker GAL4 Two-hybrid System 3 manual (both Clontech, Heidelberg, Germany) using the  
19 yeast reporter strains AH109 and Y187. The entire HopZ1a coding region was amplified by PCR using  
20 the primers listed in Table S1 and inserted in the pGBT-9 vector generating a fusion between the  
21 GAL4 DNA-binding domain (BD). The yeast strain Y187 carrying the BD-HopZ1a construct was mated  
22 with AH109 cells pre-transformed with a library derived from tobacco (*Nicotiana tabacum*) source  
23 leaves (Börnke, 2005). Diploid cells were selected on medium lacking Leu, Trp, and His supplemented  
24 with 4 mM 3-aminotriazole. Cells growing on selective medium were further tested for activity of the  
25 *lacZ* reporter gene using filter lift assays. Library plasmids from *his3/lacZ* positive clones were isolated  
26 from yeast cells and transformed into *E. coli* before sequencing of the cDNA inserts. Direct interaction  
27 of two proteins was investigated by cotransformation of the respective plasmids in the yeast strain  
28 AH109, followed by selection of transformants on medium lacking Leu and Trp at 30°C for 3 days and  
29 subsequent transfer to medium lacking Leu, Trp and His for growth selection and *lacZ* activity testing  
30 of interacting clones.

### 31 32 *Plasmid construction*

33 To generate plasmids containing the corresponding gene of interest, the entire open reading frame  
34 was amplified by PCR from *Arabidopsis* cDNA using the primers listed in Supplementary Table SX.  
35 The resulting fragments were inserted into the pENTR-D/TOPO vector according to the  
36 manufacturer's instructions (Thermo) and verified by sequencing. For yeast two-hybrid analysis,  
37 fragments were recombined into Gateway®-compatible versions of the GAL4-DNA binding domain  
38 vector pGBT-9 and the activation domain vector pGAD424 (Clontech) using L/R-clonase (Thermo). To  
39 generate translational fusions between NbREM4 and the green fluorescent protein (GFP) coding  
40 sequences were inserted into the vector pK7FWG2 (Karimi et al., 2002). Constructs for bi-molecular



1 complementation analysis are based on Gateway®-cloning compatible versions of pRB-C-Venus<sup>N173</sup>  
2 and pRB-C-Venus<sup>C155</sup>.

### 3 4 *Agrobacterium-infiltration*

5  
6 For infiltration of *N. benthamiana* leaves, *A. tumefaciens* C58C1 was infiltrated into the abaxial air  
7 space of 4- to 6-week-old plants, using a needleless 2-ml syringe. Agrobacteria were cultivated  
8 overnight at 28°C in the presence of appropriate antibiotics. The cultures were harvested by  
9 centrifugation, and the pellet was resuspended in sterile water to a final optical density at (OD<sub>600</sub>) of  
10 1.0. The cells were used for the infiltration directly after resuspension. Infiltrated plants were further  
11 cultivated in the greenhouse daily watering, and subjected to a 16 h light/8 h dark cycle (25°C/21°C) at  
12 300 μmol m<sup>-2</sup> s<sup>-1</sup> light and 75% relative humidity.

### 13 14 *In vitro pull-down*

15  
16 Recombinant MBP-NbREM4 from *Escherichia coli* (BL21 DE3, New England Biolabs) lysates was  
17 immobilized on amylose resins (New England Biolabs) and incubated for 1 h at 4°C with total protein  
18 lysates from cell expressing GST-HopZ1a or GST-NbPBS1. Proteins were eluted, and analyzed by  
19 immunoblotting using either anti-GST antibody (Sigma) or anti-MBP antibody (NEB).

### 20 21 *Western blotting*

22  
23 Leaf material was homogenized in sodium-dodecyl sulphate- polyacrylamide gel electrophoresis  
24 (SDS-PAGE) loading buffer (100 mM Tris-HCl, pH 6.8; 9% β-mercaptoethanol, 40% glycerol, 0.2%  
25 bromophenol blue, 4% SDS) and, after heating for 10 min at 95°C, subjected to gel electrophoresis.  
26 Separated proteins were transferred onto nitrocellulose membrane (Porablot, Machery und Nagel,  
27 Düren, Germany). Proteins were detected by an anti-HA-peroxidase high-affinity antibody (Roche) or  
28 anti-GFP antibody (Roche) via chemiluminescence (GE Healthcare) using a myECL imager (Thermo).

### 29 30 *Bimolecular fluorescence complementation (BiFC)*

31  
32 Constructs were transformed into *A. tumefaciens* C58C1 and transiently expressed by Agrobacterium-  
33 infiltration in *N. benthamiana*. The BiFC-induced YFP fluorescence was detected by CLSM (LSM510;  
34 Zeiss) 48 hpi. The specimens were examined using the LD LCI Plan-Apochromat 253/0.8 water-  
35 immersion objective for detailed images with excitation using the argon laser (458- or 488-nm line for  
36 BiFC and chlorophyll autofluorescence). The emitted light passed the primary beamsplitting mirrors at  
37 458/514 nm and was separated by a secondary beam splitter at 515 nm. Fluorescence was detected  
38 with filter sets as follows: on channel 3, 530–560 band pass; and on channel 1, for red  
39 autofluorescence of chlorophyll.

40  
41

1 *RNA Extraction and quantitative real-time PCR*

2

3 Total RNA was isolated from leaf material and then treated with RNase-free DNase to degrade any  
4 remaining DNA. First-strand cDNA synthesis was performed from 2 µg of total RNA using Revert-Aid  
5 reverse transcriptase (Thermo). For quantitative RT-PCR, the cDNAs were amplified using SensiFAST  
6 SYBR Lo-ROX Mix (Bioline) in the AriaMx Realtime PCR System (Agilent Technologies) as previously  
7 described (Arsova et al., 2010). At least three biological repeats and three technical repeats were  
8 used for each analysis. The transcript level was standardized based on cDNA amplification of *NbActin*  
9 as a reference. Statistical analysis was performed using Student's t test. Primers are provided in  
10 Supplemental Table S1.

11

12 *Virus-induced gene silencing*

13

14 Virus-induced gene silencing in *N. benthamiana* was essentially carried out as described previously  
15 (Liu et al., 2002a; Liu et al., 2002b). In brief, a fragment of *N. benthamiana* NbREM4 was amplified by  
16 PCR using the primers indicated in Table S1 and cloned into pTRV2- Gateway using the Gateway™  
17 recombination system (Invitrogen) as described in the section 'Construction of expression plasmids'.  
18 The plasmids were transformed into *A. tumefaciens* C58C1. A lower leaf of a 4-week-old *N.*  
19 *benthamiana* plant was co-infiltrated with a mixture of agrobacteria carrying either pTRV1 or pTRV2  
20 containing the target sequence or a GFP negative control fragment as described previously (Liu et al.,  
21 2002b). Silenced plants were analyzed 14 d post infiltration.

22

23 *Ion leakage measurements*

24

25 For electrolyte leakage experiments, triplicates of 1.76 cm<sup>2</sup> infected leaf material were taken at  
26 different time points as indicated. Leaf discs were placed on the bottom of a 15-ml tube. Eight  
27 milliliters of deionized water was added to each tube. After 4 h of incubation in a rotary shaker at RT,  
28 conductivity was determined with a conductometer. To measure the maximum conductivity of the  
29 entire sample, conductivity was determined after boiling the samples for 1 h (Stall et al., 1974).

30

31 *In vitro Kinase assay*

32

33 Purified MBP-NbREM4 or MBP-NbPBS1 (2 µg) were incubated in 20 µl of reaction buffer (10 mM  
34 HEPES pH 7.4, 2 mM MgCl<sub>2</sub>, 2 mM MnCl<sub>2</sub>, 0,2 mM DTT) containing 2 µCi of [γ-<sup>32</sup>P] ATP (Hartmann  
35 Analytics). Reactions were incubated at 30°C for 1 h. The reaction was stopped by adding 4 x  
36 Laemmli buffer and separate on a 4-12% polyacrylamide gel. The gel was stained with Coomassie  
37 and incorporated radiolabel was visualized by autoradiography.

38

39

40

41

1 *In vitro acetylation assay*

2

3 Purified proteins (2 µg) were incubated in 20 µl acetylation buffer [100 nM inositol hexakisphosphate  
4 (IP6), 50 mM HEPES at pH 8.0, 10% (vol/vol) glycerol, and 5 mM DTT], supplemented with 0,1 µCi of  
5 [<sup>14</sup>C] acetyl-CoA (40-60 mCi/mmol; Hartmann Analytics) for 1 h at 30°C. The reactions were stopped  
6 by adding 4 x Laemmli buffer and separated on a 4-12% polyacrylamide gel. Gels were fixed in  
7 fixation solution [5% (vol/vol) methanol and 10% (vol/vol) acetic acid] for 30 min. Gels were then dried  
8 and placed in a phosphorimager cassette for 10 d at RT. The SDS/PAGE gel was run in duplicate and  
9 stained with Coomassie blue to visualize proteins.

10

11 *Mass Spectrometric analysis of phosphorylation sites*

12

13 MALDI-TOF-MS/MS analyses were carried out on MBP-tagged NbREM4 in the presence of NbPBS1  
14 and kinase buffer with non-radioactive ATP. The reaction was incubated for 1 h at RT, stopped by  
15 adding 4 x Laemmli buffer, and separated on a 4-12% polyacrylamide gel. Bands corresponding to the  
16 size of MBP-NbREM4 were excised from the gel and subjected to tryptic digestion as described earlier  
17 (Witzel et al., 2017). Phosphorylated peptides were enriched using the High-Select™ Fe-NTA  
18 Phosphopeptide Enrichment Kit (ThermoFisher Scientific) following the manufacturer's instructions.  
19 The resulting eluate was desalted using C<sub>18</sub> ZipTip® Pipette Tips (MerckMillipore). After mixing 1:1  
20 with 2,5-dihydroxybenzoic acid (Bruker Daltonik GmbH, 20 mg mL<sup>-1</sup> in 30:70 [v/v] acetonitrile:0.1%  
21 trifluoroacetic acid in water, supplemented with 1% H<sub>3</sub>PO<sub>4</sub>) as a matrix, the sample was spotted onto a  
22 ground steel target and allowed to dry at room temperature. Mass spectrometric experiments were  
23 performed using an ultrafleXtreme MALDI-TOF instrument (Bruker Daltonik) run in positive ionisation  
24 mode, controlled by flexControl v3.4 software (Bruker Daltonik). The acquired peptide mass fingerprint  
25 data was processed with flexAnalysis v3.4 (Bruker Daltonik) and matched to the amino acid sequence  
26 of MBP-tagged NbREM4 via MASCOT search engine (Matrix Science). Search parameters were:  
27 monoisotopic mass accuracy, one missed cleavage and allowed variable modification as  
28 phosphorylation (ST). Peptide tolerance for peptide mass fingerprinting (PMF) was 50 ppm and, for *de*  
29 *novo* sequencing, peptide tolerance was 50 ppm and 0.7 Da fragment tolerance. Acquisition of LIFT  
30 spectra was pursued for a peptide *m/z* 2474.03, where a putative phosphorylation was detected.  
31 Peptide mass fingerprinting spectra and corresponding LIFT spectra were calibrated using external  
32 calibration (Peptide Calibration Standard II, Bruker Daltonik).

33

34 **Supplemental data**

35

36 The following supplemental materials are available:

37

38 **Supplemental Figure S1:** Alignment of remorin protein sequences.

39

40 **Supplemental Figure S2:** Phylogenetic tree of Arabidopsis remorins incorporating NbRemorin.

41

1  
2 **Supplemental Figure S3:** Yeast two-hybrid assay to test for the interaction of HopZ1a with other  
3 remorin isoforms.

4  
5 **Supplemental Figure S4:** NbREM4 forms homomers in yeast and *in planta*.

6  
7 **Supplemental Figure S5:** Negative controls for HopZ1a/NbREM4 BiFC experiments.

8  
9 **Supplemental Figure S6:** Alignment of PBS1 protein sequences.

10  
11 **Supplemental Figure S7:** NbREM4/RLCK interactions in yeast.

12  
13 **Supplemental Figure S8:** NetPhos analysis of the NbREM4 protein sequence to putative predict  
14 phosphorylation sites.

15  
16 **Supplementary Figure S9:** *In vitro* acetylation assay of NbREM4 by HopZ1a.

17  
18 **Supplementary Figure S10:** Virus-induced gene silencing of *NbREM4* does not affect HR induction  
19 by HopZ1a expression in *N. benthamiana*.

20  
21 **Supplementary Table S1:** Oligonucleotides used in this study.

22  
23 **Acknowledgements**

24 This work was supported by grants from the Deutsche Forschungsgemeinschaft (BO1916/5-1 and  
25 BO1916/5-2) to F.B. The skillful technical help of Mandy Heinze, Susanne Jeserigk and Kerstin Bieler  
26 is gratefully acknowledged.

27

1 **References**

2

- 3 Arsova, B., Hoja, U., Wimmelbacher, M., Greiner, E., Üstün, S., Melzer, M., Petersen, K., Lein, W., and  
4 Börnke, F. 2010. Plastidial thioredoxin z interacts with two fructokinase-like proteins in a  
5 thiol-dependent manner: evidence for an essential role in chloroplast development in  
6 Arabidopsis and Nicotiana benthamiana. *Plant Cell* 22:1498-1515.
- 7 Baudin, M., Hassan, J.A., Schreiber, K.J., and Lewis, J.D. 2017. Analysis of the ZAR1 Immune Complex  
8 Reveals Determinants for Immunity and Molecular Interactions. *Plant Physiol* 174:2038-2053.
- 9 Benschop, J.J., Mohammed, S., O'Flaherty, M., Heck, A.J., Slijper, M., and Menke, F.L. 2007.  
10 Quantitative phosphoproteomics of early elicitor signaling in Arabidopsis. *Mol Cell*  
11 *Proteomics* 6:1198-1214.
- 12 Bi, G., Zhou, Z., Wang, W., Li, L., Rao, S., Wu, Y., Zhang, X., Menke, F.L.H., Chen, S., and Zhou, J.-M.  
13 2018. Receptor-Like Cytoplasmic Kinases Directly Link Diverse Pattern Recognition Receptors  
14 to the Activation of Mitogen-Activated Protein Kinase Cascades in Arabidopsis. *The Plant Cell*  
15 30:1543-1561.
- 16 Börnke, F. 2005. The variable C-terminus of 14-3-3 proteins mediates isoform-specific interaction  
17 with sucrose-phosphate synthase in the yeast two-hybrid system. *J Plant Physiol* 162:161-  
18 168.
- 19 Bozkurt, T.O., Richardson, A., Dagdas, Y.F., Mongrand, S., Kamoun, S., and Raffaele, S. 2014. The Plant  
20 Membrane-Associated REMORIN1.3 Accumulates in Discrete Perahaustorial Domains and  
21 Enhances Susceptibility to *Phytophthora infestans*. *Plant Physiology* 165:1005-  
22 1018.
- 23 Büttner, D. 2016. Behind the lines-actions of bacterial type III effector proteins in plant cells. *FEMS*  
24 *Microbiol Rev* 40:894-937.
- 25 Cesari, S. 2018. Multiple strategies for pathogen perception by plant immune receptors. *The New*  
26 *phytologist* 219:17-24.
- 27 Demir, F., Horntrich, C., Blachutzik, J.O., Scherzer, S., Reinders, Y., Kierszniowska, S., Schulze, W.X.,  
28 Harms, G.S., Hedrich, R., Geiger, D., and Kreuzer, I. 2013. Arabidopsis nanodomain-delimited  
29 ABA signaling pathway regulates the anion channel SLAH3. *P Natl Acad Sci USA* 110:8296-  
30 8301.
- 31 Dodds, P.N., and Rathjen, J.P. 2010. Plant immunity: towards an integrated view of plant-pathogen  
32 interactions. *Nat Rev Genet* 11:539-548.
- 33 Fu, S., Xu, Y., Li, C., Li, Y., Wu, J., and Zhou, X. 2018. Rice Stripe Virus Interferes with S-acylation of  
34 Remorin and Induces Its Autophagic Degradation to Facilitate Virus Infection. *Molecular Plant*  
35 11:269-287.
- 36 Goodin, M.M., Zaitlin, D., Naidu, R.A., and Lommel, S.A. 2008. *Nicotiana benthamiana*: its history and  
37 future as a model for plant-pathogen interactions. *Mol Plant Microbe Interact* 21:1015-1026.
- 38 Gronnier, J., Crowet, J.-M., Habenstein, B., Nasir, M.N., Bayle, V., Hosy, E., Platre, M.P., Gouguet, P.,  
39 Raffaele, S., Martinez, D., Grelard, A., Loquet, A., Simon-Plas, F., Gerbeau-Pissot, P., Der, C.,  
40 Bayer, E.M., Jaillais, Y., Deleu, M., Germain, V., Lins, L., and Mongrand, S. 2017. Structural  
41 basis for plant plasma membrane protein dynamics and organization into functional  
42 nanodomains. *eLife* 6:e26404.
- 43 Hicks, S.W., and Galán, J.E. 2013. Exploitation of Eukaryotic Subcellular Targeting Mechanisms by  
44 Bacterial Effectors. *Nature reviews. Microbiology* 11:10.1038/nrmicro3009.
- 45 Hoefle, C., and Hükelhoven, R. 2008. Enemy at the gates: traffic at the plant cell pathogen interface.  
46 *Cellular Microbiology* 10:2400-2407.
- 47 Hurley, B., Lee, D., Mott, A., Wilton, M., Liu, J., Liu, Y.C., Angers, S., Coaker, G., Guttman, D.S., and  
48 Desveaux, D. 2014. The *Pseudomonas syringae* type III effector HopF2 suppresses  
49 Arabidopsis stomatal immunity. *PLoS One* 9:e114921.
- 50 Jarsch, I.K., and Ott, T. 2011. Perspectives on remorin proteins, membrane rafts, and their role during  
51 plant-microbe interactions. *Mol Plant Microbe Interact* 24:7-12.

- 1 Jarsch, I.K., Konrad, S.S., Stratil, T.F., Urbanus, S.L., Szymanski, W., Braun, P., Braun, K.H., and Ott, T.  
2 2014. Plasma Membranes Are Subcompartmentalized into a Plethora of Coexisting and  
3 Diverse Microdomains in Arabidopsis and Nicotiana benthamiana. *Plant Cell* 26:1698-1711.
- 4 Jiang, S., Yao, J., Ma, K.W., Zhou, H., Song, J., He, S.Y., and Ma, W. 2013. Bacterial effector activates  
5 jasmonate signaling by directly targeting JAZ transcriptional repressors. *PLoS Pathog*  
6 9:e1003715.
- 7 Jones, J.D., and Dangl, J.L. 2006. The plant immune system. *Nature* 444:323-329.
- 8 Karimi, M., Inzé, D., and Depicker, A. 2002. GATEWAY<sup>(TM)</sup> vectors for *Agrobacterium*-mediated plant  
9 transformation. *Trends Plant Sci* 7:193-195.
- 10 Khan, M., Seto, D., Subramaniam, R., and Desveaux, D. 2018a. Oh, the places they'll go! A survey of  
11 phytopathogen effectors and their host targets. *Plant J* 93:651-663.
- 12 Khan, M., Youn, J.Y., Gingras, A.C., Subramaniam, R., and Desveaux, D. 2018b. In planta proximity  
13 dependent biotin identification (BioID). *Sci Rep* 8:9212.
- 14 Lal, N.K., Nagalakshmi, U., Hurlburt, N.K., Flores, R., Bak, A., Sone, P., Ma, X., Song, G., Walley, J.,  
15 Shan, L., He, P., Casteel, C., Fisher, A.J., and Dinesh-Kumar, S.P. 2018. The Receptor-like  
16 Cytoplasmic Kinase BIK1 Localizes to the Nucleus and Regulates Defense Hormone  
17 Expression during Plant Innate Immunity. *Cell Host & Microbe* 23:485-497.e485.
- 18 Laluk, K., Luo, H., Chai, M., Dhawan, R., Lai, Z., and Mengiste, T. 2011. Biochemical and genetic  
19 requirements for function of the immune response regulator BOTRYTIS-INDUCED KINASE1 in  
20 plant growth, ethylene signaling, and PAMP-triggered immunity in Arabidopsis. *Plant Cell*  
21 23:2831-2849.
- 22 Lee, A.H.-Y., Hurley, B., Felsensteiner, C., Yea, C., Ckurshumova, W., Bartetzko, V., Wang, P.W.,  
23 Quach, V., Lewis, J.D., Liu, Y.C., Boernke, F., Angers, S., Wilde, A., Guttman, D.S., and  
24 Desveaux, D. 2012a. A Bacterial Acetyltransferase Destroys Plant Microtubule Networks and  
25 Blocks Secretion. *Plos Pathogens* 8.
- 26 Lee, A.H., Hurley, B., Felsensteiner, C., Yea, C., Ckurshumova, W., Bartetzko, V., Wang, P.W., Quach,  
27 V., Lewis, J.D., Liu, Y.C., Börnke, F., Angers, S., Wilde, A., Guttman, D.S., and Desveaux, D.  
28 2012b. A bacterial acetyltransferase destroys plant microtubule networks and blocks  
29 secretion. *PLoS Pathog* 8:e1002523.
- 30 Lefebvre, B., Timmers, T., Mbengue, M., Moreau, S., Herve, C., Toth, K., Bittencourt-Silvestre, J.,  
31 Klaus, D., Deslandes, L., Godiard, L., Murray, J.D., Udvardi, M.K., Raffaele, S., Mongrand, S.,  
32 Cullimore, J., Gamas, P., Niebel, A., and Ott, T. 2010. A remorin protein interacts with  
33 symbiotic receptors and regulates bacterial infection. *Proc Natl Acad Sci U S A* 107:2343-  
34 2348.
- 35 Lewis, J.D., Wu, R., Guttman, D.S., and Desveaux, D. 2010. Allele-specific virulence attenuation of the  
36 *Pseudomonas syringae* HopZ1a type III effector via the Arabidopsis ZAR1 resistance protein.  
37 *PLoS Genet* 6:e1000894.
- 38 Lewis, J.D., Abada, W., Ma, W., Guttman, D.S., and Desveaux, D. 2008. The HopZ Family of  
39 *Pseudomonas syringae* Type III Effectors Require Myristoylation for Virulence and Avirulence  
40 Functions in Arabidopsis thaliana. *J Bacteriol* 190:2880-2891.
- 41 Lewis, J.D., Lee, A., Ma, W., Zhou, H., Guttman, D.S., and Desveaux, D. 2011. The YopJ superfamily in  
42 plant-associated bacteria. *Mol Plant Pathol* 12:928-937.
- 43 Lewis, J.D., Wilton, M., Mott, G.A., Lu, W., Hassan, J.A., Guttman, D.S., and Desveaux, D. 2014.  
44 Immunomodulation by the *Pseudomonas syringae* HopZ type III effector family in  
45 Arabidopsis. *PLoS One* 9:e116152.
- 46 Lewis, J.D., Lee, A.H., Hassan, J.A., Wan, J., Hurley, B., Jhingree, J.R., Wang, P.W., Lo, T., Youn, J.Y.,  
47 Guttman, D.S., and Desveaux, D. 2013. The Arabidopsis ZED1 pseudokinase is required for  
48 ZAR1-mediated immunity induced by the *Pseudomonas syringae* type III effector HopZ1a.  
49 *Proc Natl Acad Sci U S A* 110:18722-18727.
- 50 Liang, P., Stratil, T.F., Popp, C., Marín, M., Folgmann, J., Mysore, K.S., Wen, J., and Ott, T. 2018.  
51 Symbiotic root infections in *Medicago truncatula* require remorin-mediated receptor



- 1 stabilization in membrane nanodomains. *Proceedings of the National Academy of Sciences*  
2 115:5289-5294.
- 3 Lin, W., Ma, X., Shan, L., and He, P. 2013. Big Roles of Small Kinases: The Complex Functions of  
4 Receptor-Like Cytoplasmic Kinases in Plant Immunity and Development. *Journal of*  
5 *Integrative Plant Biology* 55:1188-1197.
- 6 Liu, Y., Schiff, M., and Dinesh-Kumar, S.P. 2002a. Virus-induced gene silencing in tomato. *Plant J*  
7 31:777-786.
- 8 Liu, Y., Schiff, M., Marathe, R., and Dinesh-Kumar, S.P. 2002b. Tobacco Rar1, EDS1 and NPR1/NIM1  
9 like genes are required for N-mediated resistance to tobacco mosaic virus. *Plant J* 30:415-  
10 429.
- 11 Lu, D., Wu, S., He, P., and Shan, L. 2010. Phosphorylation of receptor-like cytoplasmic kinases by  
12 bacterial Flagellin. *Plant signaling & behavior* 5:598-600.
- 13 Ma, W., Dong, F.F., Stavrinides, J., and Guttman, D.S. 2006. Type III effector diversification via both  
14 pathoadaptation and horizontal transfer in response to a coevolutionary arms race. *PLoS*  
15 *Genet* 2:e209.
- 16 Macho, A.P., and Zipfel, C. 2015. Targeting of plant pattern recognition receptor-triggered immunity  
17 by bacterial type-III secretion system effectors. *Curr Opin Microbiol* 23C:14-22.
- 18 Marín, M., and Ott, T. 2012. Phosphorylation of Intrinsically Disordered Regions in Remorin Proteins.  
19 *Frontiers in plant science* 3:86.
- 20 Marín, M., Thallmair, V., and Ott, T. 2012. The Intrinsically Disordered N-terminal Region of AtREM1.3  
21 Remorin Protein Mediates Protein-Protein Interactions. *The Journal of Biological Chemistry*  
22 287:39982-39991.
- 23 Nguyen, H.P., Chakravarthy, S., Velasquez, A.C., McLane, H.L., Zeng, L., Nakayashiki, H., Park, D.H.,  
24 Collmer, A., and Martin, G.B. 2010. Methods to study PAMP-triggered immunity using  
25 tomato and *Nicotiana benthamiana*. *Mol Plant Microbe Interact* 23:991-999.
- 26 Perraki, A., Binaghi, M., Mecchia, M.A., Gronnier, J., German-Retana, S., Mongrand, S., Bayer, E.,  
27 Zelada, A.M., and Germain, V. 2014. StRemorin1.3 hampers Potato virus X TGBp1 ability to  
28 increase plasmodesmata permeability, but does not interfere with its silencing suppressor  
29 activity. *Febs Lett* 588:1699-1705.
- 30 Raffaele, S., Mongrand, S., Gamas, P., Niebel, A., and Ott, T. 2007. Genome-wide annotation of  
31 remorins, a plant-specific protein family: evolutionary and functional perspectives. *Plant*  
32 *Physiol* 145:593-600.
- 33 Raffaele, S., Bayer, E., Lafarge, D., Cluzet, S., German Retana, S., Boubekour, T., Leborgne-Castel, N.,  
34 Carde, J.P., Lherminier, J., Noiro, E., Satiat-Jeunemaitre, B., Laroche-Traineau, J., Moreau, P.,  
35 Ott, T., Maule, A.J., Reymond, P., Simon-Plas, F., Farmer, E.E., Bessoule, J.J., and Mongrand, S.  
36 2009. Remorin, a solanaceae protein resident in membrane rafts and plasmodesmata,  
37 impairs potato virus X movement. *Plant Cell* 21:1541-1555.
- 38 Rao, S., Zhou, Z., Miao, P., Bi, G., Hu, M., Wu, Y., Feng, F., Zhang, X., and Zhou, J.-M. 2018. Roles of  
39 Receptor-Like Cytoplasmic Kinase VII Members in Pattern-Triggered Immune Signaling. *Plant*  
40 *Physiology* 177:1679-1690.
- 41 Reymond, P., Kunz, B., Paul-Pletzer, K., Grimm, R., Eckerskorn, C., and Farmer, E.E. 1996. Cloning of a  
42 cDNA encoding a plasma membrane-associated, uronide binding phosphoprotein with  
43 physical properties similar to viral movement proteins. *The Plant Cell* 8:2265-2276.
- 44 Seto, D., Koulana, N., Lo, T., Menna, A., Guttman, D.S., and Desveaux, D. 2017. Expanded type III  
45 effector recognition by the ZAR1 NLR protein using ZED1-related kinases. *Nat Plants* 3:17027.
- 46 Shao, F., Golstein, C., Ade, J., Stoutemyer, M., Dixon, J.E., and Innes, R.W. 2003. Cleavage of  
47 *Arabidopsis* PBS1 by a bacterial type III effector. *Science* 301:1230-1233.
- 48 Simon-Plas, F., Perraki, A., Bayer, E., Gerbeau-Pissot, P., and Mongrand, S. 2011. An update on plant  
49 membrane rafts. *Current Opinion in Plant Biology* 14:642-649.
- 50 Simons, K., and Gerl, M.J. 2010. Revitalizing membrane rafts: new tools and insights. *Nat Rev Mol Cell*  
51 *Bio* 11:688.

- 1 Son, S., Oh, C.J., and An, C.S. 2014. Arabidopsis thaliana Remorins Interact with SnRK1 and Play a Role  
2 in Susceptibility to Beet Curly Top Virus and Beet Severe Curly Top Virus. *The Plant Pathology*  
3 *Journal* 30:269-278.
- 4 Stall, R.E., Bartz, J.A., and Cook, A.A. 1974. Decreased hypersensitivity to xanthomonads in pepper  
5 after inoculations with virulent cells of *Xanthomonas vesicatoria*. *Phytopathology* 64:731-735.
- 6 Sun, J., Huang, G., Fan, F., Wang, S., Zhang, Y., Han, Y., Zou, Y., and Lu, D. 2017. Comparative study of  
7 Arabidopsis PBS1 and a wheat PBS1 homolog helps understand the mechanism of PBS1  
8 functioning in innate immunity. *Scientific Reports* 7:5487.
- 9 Toth, K., Stratil, T.F., Madsen, E.B., Ye, J., Popp, C., Antolin-Llovera, M., Grossmann, C., Jensen, O.N.,  
10 Schussler, A., Parniske, M., and Ott, T. 2012. Functional domain analysis of the Remorin  
11 protein LjSYMREM1 in *Lotus japonicus*. *PLoS One* 7:e30817.
- 12 Wang, G., Roux, B., Feng, F., Guy, E., Li, L., Li, N., Zhang, X., Lautier, M., Jardinaud, M.F., Chabannes,  
13 M., Arlat, M., Chen, S., He, C., Noel, L.D., and Zhou, J.M. 2015. The Decoy Substrate of a  
14 Pathogen Effector and a Pseudokinase Specify Pathogen-Induced Modified-Self Recognition  
15 and Immunity in Plants. *Cell Host Microbe* 18:285-295.
- 16 Witzel, K., Buhtz, A., and Grosch, R. 2017. Temporal impact of the vascular wilt pathogen *Verticillium*  
17 *dahliae* on tomato root proteome. *J Proteomics* 169:215-224.
- 18 Yamada, K., Yamaguchi, K., Shirakawa, T., Nakagami, H., Mine, A., Ishikawa, K., Fujiwara, M.,  
19 Narusaka, M., Narusaka, Y., Ichimura, K., Kobayashi, Y., Matsui, H., Nomura, Y., Nomoto, M.,  
20 Tada, Y., Fukao, Y., Fukamizo, T., Tsuda, K., Shirasu, K., Shibuya, N., and Kawasaki, T. 2016.  
21 The *Arabidopsis* CERK1-associated kinase PBL27 connects chitin perception to MAPK  
22 activation. *The EMBO Journal* 35:2468-2483.
- 23 Zhang, J., Li, W., Xiang, T., Liu, Z., Laluk, K., Ding, X., Zou, Y., Gao, M., Zhang, X., Chen, S., Mengiste, T.,  
24 Zhang, Y., and Zhou, J.M. 2010. Receptor-like cytoplasmic kinases integrate signaling from  
25 multiple plant immune receptors and are targeted by a *Pseudomonas syringae* effector. *Cell*  
26 *Host Microbe* 7:290-301.
- 27 Zheng, X.Y., Spivey, N.W., Zeng, W., Liu, P.P., Fu, Z.Q., Klessig, D.F., He, S.Y., and Dong, X. 2012.  
28 Coronatine promotes *Pseudomonas syringae* virulence in plants by activating a signaling  
29 cascade that inhibits salicylic acid accumulation. *Cell Host Microbe* 11:587-596.
- 30 Zhou, H., Lin, J., Johnson, A., Morgan, R.L., Zhong, W., and Ma, W. 2011. *Pseudomonas syringae* type  
31 III effector HopZ1 targets a host enzyme to suppress isoflavone biosynthesis and promote  
32 infection in soybean. *Cell Host Microbe* 9:177-186.

33

34

1 **Figure Legends**

2

3 **Figure 1. HopZ1a interacts with a remorin in yeast two-hybrid assays.** HopZ1a fused to the GAL4  
4 DNA binding domain (BD) was expressed in combination with remorin fused to the GAL4 activation  
5 domain (AD) in yeast strain Y190. Cells were grown on selective media before a LacZ filter assay was  
6 performed. pSV40/p53 served as positive control while the empty AD vector served as negative  
7 control. NtRemorin, *N. tabacum* remorin; NbRemorin, *N. benthamiana* remorin. – LT, yeast growth on  
8 medium without Leu and Trp. – HLT, yeast growth on medium lacking His, Leu, and Trp, indicating  
9 expression of the *HIS3* reporter gene. LacZ, activity of the *lacZ* reporter gene.

10

11 **Figure 2. The NbREM4 C-terminus is required and sufficient for HopZ1a interaction in yeast. A,**  
12 schematical representation of the NbREM4 domain structure. **B,** HopZ1a interacts with the NbREM4  
13 C-terminal region (NbREM4<sup>C</sup>) comprising amino acids 182 – 296 but not with the N-terminus of  
14 NbREM4 (NbREM4<sup>N</sup>) covering amino acids 1 – 181. Cells were grown on selective media before a  
15 LacZ filter assay was performed. pSV40/p53 served as positive control while the empty BD vector  
16 served as negative control. – LT, yeast growth on medium without Leu and Trp. – HLT, yeast growth  
17 on medium lacking His, Leu, and Trp, indicating expression of the *HIS3* reporter gene. LacZ, activity of  
18 the *lacZ* reporter gene.

19

20 **Figure 3. Subcellular localization of HopZ1a and NbREM4 in planta. A,** Subcellular localization of  
21 HopZ1a<sup>C/A</sup>-GFP in *N. benthamiana* leaves transiently transformed by *Agrobacterium*-infiltration. For  
22 confocal laser scanning microscopy samples were taken 48 hpi. **B,** Subcellular localization of GFP-  
23 NbREM4. Membranes were stained with FM4-64 (middle) and green and red fluorescence channels  
24 were recorded separately to prevent bleed through. The resulting fluorescence images were merged  
25 (right). Pictures were taken 48 hpi.

26

27 **Figure 4. Interaction of HopZ1a with NbREM4 in planta and in vitro. A,** BiFC in planta interaction  
28 studies of HopZ1a variants with NbREM4. YFP confocal microscopy images show *N. benthamiana*  
29 leaf epidermal cells transiently expressing HopZ1a<sup>C/A</sup>-Venus<sup>C</sup> in combination with Venus<sup>N</sup>-NbREM4. A  
30 close-up of the same cells shows that the YFP fluorescence of HopZ1a<sup>C/A</sup>-Venus<sup>C</sup>/Venus<sup>N</sup>-NbREM4  
31 aligns with the plasma membrane. The lower panel shows DIC images of leaf epidermal cells  
32 expressing a combination of Venus<sup>N</sup>-NbREM4 and HopZ1a<sup>G/A</sup>-Venus<sup>C</sup>, indicating that a mutation at  
33 the myristoylation site at G2 of HopZ1a abolishes the interaction with NbREM4. **B,** *In vitro* pull-down  
34 assay showing physical interaction of HopZ1a with NbREM4. MBP-NbREM4 and GST-HopZ1a were  
35 expressed in *E. coli*. Pull-down was performed using amylose resin. Proteins were detected in an  
36 immunoblot using antibodies as indicated.

37

38 **Figure 5. Transient over-expression of NbREM4 in leaves of *N. benthamiana* leads to tissue**  
39 **damage. A,** Time course of phenotype development in *N. benthamiana* leaves infiltrated with  
40 *Agrobacterium tumefaciens* strains that mediate T-DNA-based transfer of NbREM4 and empty vector  
41 (EV). dpi = days post infiltration. **B,** Ion leakage was measured in plants transiently expressing

1 NbREM4 and EV at time points indicated. Bars represent the average ion leakage measured for  
2 triplicates of six leaf disks each, and the error bars indicate SD. The asterisk indicates a significant  
3 difference ( $*P < 0.05$ ,  $**P < 0.01$ ) based on results of a Student's *t*-test. The experiment has been  
4 repeated three times with similar results. **C**, Protein extracts from *N. benthamiana* leaves transiently  
5 expressing GFP-NbREM4 at the time points indicated were prepared. Equal volumes representing  
6 approximately equal protein amounts of each extract were immunoblotted and proteins were detected  
7 using anti-GFP antiserum. Amido black staining served as a loading control.

8

9 **Figure 6. Expression of selected defense-related genes in *N. benthamiana* leaves transiently**  
10 **expressing NbREM4.** Quantitative real-time PCR (RT-PCR) of indicated defense-related genes was  
11 carried out on samples taken from *N. benthamiana* leaves transiently expressing NbREM4 or the  
12 empty vector control (EV) at the time points indicated. *Actin* was used as a reference gene. Each bar  
13 represents the mean of four biological replicates  $\pm$  SE. \* marks significant differences ( $P > 0.05$ )  
14 according to Student's *t*-test.

15

16 **Figure 7. NbREM4 interacts with PBS1 in yeast two-hybrid assays and *in planta*.** **A**, NbREM4  
17 fused to the GAL4 DNA binding domain (BD) was expressed in combination with PBS1 fused to the  
18 GAL4 activation domain (AD) in yeast strain Y190. Cells were grown on selective media before a LacZ  
19 filter assay was performed. The empty BD vector or AD vector, respectively, served as negative  
20 control. NbPBS1, *N. benthamiana* PBS1; AtPBS1, *A. thaliana* PBS1. – LT, yeast growth on medium  
21 without Leu and Trp. – HLT, yeast growth on medium lacking His, Leu, and Trp, indicating expression  
22 of the *HIS3* reporter gene. LacZ, activity of the lacZ reporter gene. **B**, Co-localization of NbPBS1-GFP  
23 and RFP-NbREM4 in *N. benthamiana* leaf epidermal cells. NbPBS1-GFP was co-expressed with  
24 RFP-NbREM4 by *Agrobacterium*-infiltration. The green fluorescence (GFP), red fluorescence  
25 (mCherry) and chlorophyll autofluorescence (blue) were monitored separately to prevent cross-talk of  
26 the fluorescence channels and the resulting fluorescence images were merged. **C**, BiFC *in planta*  
27 interaction of NbPBS1 with NbREM4. YFP confocal microscopy images show *N. benthamiana* leaf  
28 epidermal cells transiently expressing NbPBS1-Venus<sup>N</sup> in combination with Venus<sup>C</sup>-NbREM4. A close-  
29 up of the same cells shows that the YFP fluorescence produced by the interaction of NbPBS1-Venus<sup>N</sup>  
30 with Venus<sup>C</sup>-NbREM4 aligns with the plasma membrane.

31

32 **Figure 8. PBS1 phosphorylates NbREM4 *in vitro*.** **A**, *In vitro* phosphorylation assay of NbREM4 by  
33 AtPBS1. Recombinant proteins were incubated in the presence of <sup>32</sup>P-ATP and the mixture was  
34 subsequently resolved by SDS-PAGE. MBP (maltose-binding protein) served as a negative control.  
35 Left, autoradiogram; right, coomassie blue stain for protein visualization. **B**, MALDI-TOF MS/MS  
36 spectrum of an ion at *m/z* 2474.03 derived from *in vitro* phosphorylated NbREM4. Peptide  
37 fragmentation provides strong evidence for the sequence <sup>64</sup>S to <sup>86</sup>R of the NbREM4 polypeptide with  
38 phosphorylation occurring at <sup>64</sup>S (inset). Intact y-ions are labeled in blue, intact b-ions are labeled in  
39 red. **C**, *In vitro* phosphorylation of NbREM4<sup>S64/64A</sup> compared to the wild type NbREM4 protein.  
40 Recombinant proteins were incubated in the presence of <sup>32</sup>P-ATP and the mixture was subsequently

1 resolved by SDS-PAGE. Left, autoradiogram; right, coomassie blue stain for protein visualization. **D**,  
2 Densitometric analysis of NbREM4<sup>S64/64A</sup> phosphorylation using ImageJ.

3

4 **Figure 9. Relocation of NbREM4 upon flg22 treatment into punctuate structures.** Confocal  
5 micrographs of *N. benthamiana* leaf epidermal cells transiently expressing GFP-NbREM4 challenged  
6 flg22 as compared to a H<sub>2</sub>O control. The flg22 treatment was performed 48 hpi and 60 min before  
7 imaging. Left, overview; right, magnification of the inset indicated on the left.

8

9 **Figure 10. Transient HopZ1a expression induces an HR in *N. benthamiana* leaves.** **A**,  
10 *Agrobacterium*-mediated transient expression assay in *N. benthamiana*. The constructs indicated were  
11 inoculated into the leaf areas delineated by the dashed line. The picture was taken 48 hpi. **B**, Ion  
12 leakage was measured in plants transiently expressing the constructs indicated 48 hpi with  
13 *Agrobacteria*. Bars represent the average ion leakage measured for triplicates of six leaf disks each,  
14 and the error bars indicate SD. The asterisk indicates a significant difference (\*\* $P < 0.05$ , \*\*\* $P < 0.01$ )  
15 based on results of a Student's *t*-test. **C**, Protein immunoblot of HopZ1a-HA, HopZ1<sup>C/A</sup>-HA and  
16 AvrRxv-GFP, verifying protein expression. Samples were collected 48 hpi and probed with  $\alpha$ -HA  
17 antibody or  $\alpha$ -GFP antibody, respectively. Amido-black staining is included to show equal loading of  
18 the samples.

19

20 **Figure 11. Down-regulation of ZAR1 expression abolishes HopZ1a triggered HR.** **A**, quantitative  
21 real-time RT-PCR analysis of *ZAR1* down-regulation in *NbZAR1*-VIGS *N. benthamiana* plants. Total  
22 RNA was isolated from leaves of VIGS plants 14 dpi and subjected to cDNA synthesis followed by  
23 qRT-PCR. Bars represent the mean of at least three biological replicates  $\pm$  SD. The asterisk indicates  
24 a significant difference (\* $P < 0.05$ ) based on results of a Student's *t*-test. **B**, Leaves of *NbZAR1*-VIGS  
25 and *GFP*-VIGS plants were infiltrated with the constructs indicated by the dashed line. **C**, Protein  
26 immunoblot of HopZ1a-HA and HopZ1<sup>C/A</sup>-HA, verifying protein expression VIGS plants. Samples were  
27 collected 2 dpi and probed with an  $\alpha$ -HA antibody. Amido-black staining is included to show equal  
28 protein loading. **D**, Ion leakage was measured in VIGS plants transiently expressing the constructs  
29 indicated on the left 48 hpi. Bars represent the average ion leakage measured for triplicates of six leaf  
30 discs each, and the error bars indicate SD. The asterisk indicates a significant difference (\*\* $P < 0.01$ )  
31 based on results of a Student's *t*-test.

32

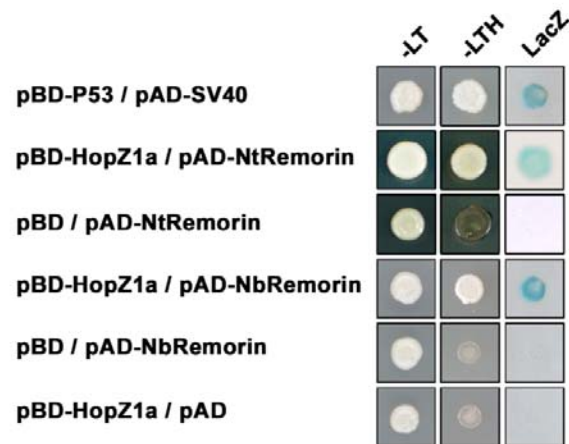

**Figure 1. HopZ1a interacts with a remorin in yeast two-hybrid assays.** HopZ1a fused to the GAL4 DNA binding domain (BD) was expressed in combination with remorin fused to the GAL4 activation domain (AD) in yeast strain Y190. Cells were grown on selective media before a LacZ filter assay was performed. pSV40/p53 served as positive control while the empty AD vector served as negative control. NtRemorin, *N. tabacum* remorin; NbRemorin, *N. benthamiana* remorin. – LT, yeast growth on medium without Leu and Trp. – HLT, yeast growth on medium lacking His, Leu, and Trp, indicating expression of the *HIS3* reporter gene. LacZ, activity of the *lacZ* reporter gene.



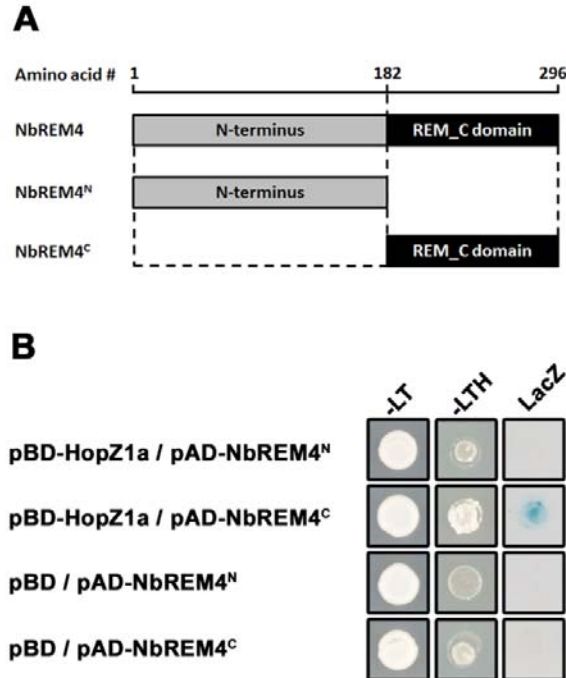

**Figure 2. The NbREM4 C-terminus is required and sufficient for HopZ1a interaction in yeast. A,** schematical representation of the NbREM4 domain structure. **B,** HopZ1a interacts with the NbREM4 C-terminal region (NbREM4<sup>C</sup>) comprising amino acids 182 – 296 but not with the N-terminus of NbREM4 (NbREM4<sup>N</sup>) covering amino acids 1 – 181. Cells were grown on selective media before a LacZ filter assay was performed. pSV40/p53 served as positive control while the empty BD vector served as negative control. – LT, yeast growth on medium without Leu and Trp. – HLT, yeast growth on medium lacking His, Leu, and Trp, indicating expression of the *HIS3* reporter gene. LacZ, activity of the *lacZ* reporter gene.

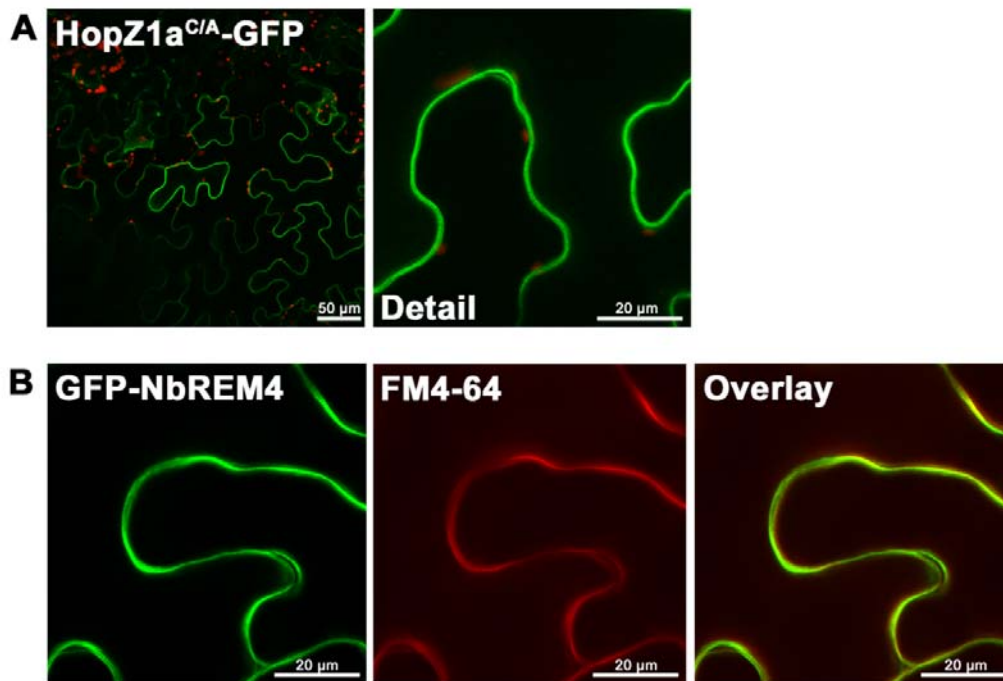

**Figure 3. Subcellular localization of HopZ1a and NbREM4 in planta.** **A**, Subcellular localization of HopZ1a<sup>C/A</sup>-GFP in *N. benthamiana* leaves transiently transformed by *Agrobacterium*-infiltration. For confocal laser scanning microscopy samples were taken 48 hpi. **B**, Subcellular localization of GFP-NbREM4. Membranes were stained with FM4-64 (middle) and green and red fluorescence channels were recorded separately to prevent bleed through. The resulting fluorescence images were merged (right). Pictures were taken 48 hpi.

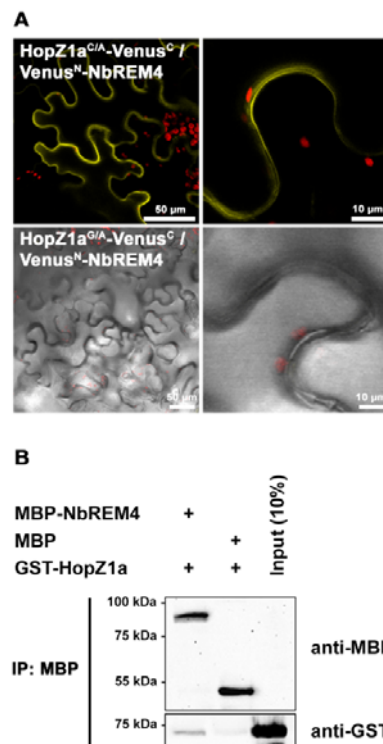

**Figure 4. Interaction of HopZ1a with NbREM4 *in planta* and *in vitro*.** **A**, BiFC in *planta* interaction studies of HopZ1a variants with NbREM4. YFP confocal microscopy images show *N. benthamiana* leaf epidermal cells transiently expressing HopZ1a<sup>C/A</sup>-Venus<sup>C</sup> in combination with Venus<sup>N</sup>-NbREM4. A close-up of the same cells shows that the YFP fluorescence of HopZ1a<sup>C/A</sup>-Venus<sup>C</sup>/Venus<sup>N</sup>-NbREM4 aligns with the plasma membrane. The lower panel shows DIC images of leaf epidermal cells expressing a combination of Venus<sup>N</sup>-NbREM4 and HopZ1a<sup>G/A</sup>-Venus<sup>C</sup>, indicating that a mutation at the myristoylation site at G2 of HopZ1a abolishes the interaction with NbREM4. **B**, *In vitro* pull-down assay showing physical interaction of HopZ1a with NbREM4. MBP-NbREM4 and GST-HopZ1a were expressed in *E. coli*. Pull-down was performed using amylose resin. Proteins were detected in an immunoblot using antibodies as indicated.

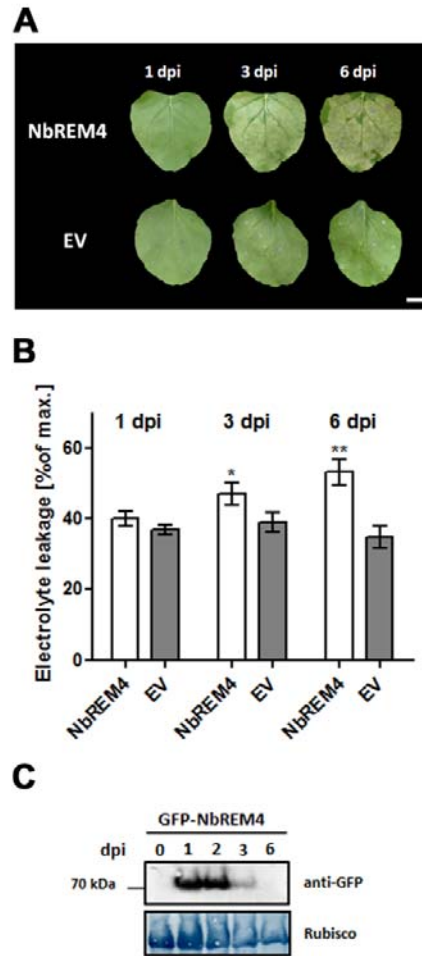

**Figure 5. Transient over-expression of NbREM4 in leaves of *N. benthamiana* leads to tissue damage.** **A**, Time course of phenotype development in *N. benthamiana* leaves infiltrated with *Agrobacterium tumefaciens* strains that mediate T-DNA-based transfer of NbREM4 and empty vector (EV). dpi = days post infiltration. **B**, Ion leakage was measured in plants transiently expressing NbREM4 and EV at time points indicated. Bars represent the average ion leakage measured for triplicates of six leaf disks each, and the error bars indicate SD. The asterisk indicates a significant difference (\* $P < 0.05$ , \*\* $P < 0.01$ ) based on results of a Student's *t*-test. The experiment has been repeated three times with similar results. **C**, Protein extracts from *N. benthamiana* leaves transiently expressing GFP-NbREM4 at the time points indicated were prepared. Equal volumes representing approximately equal protein amounts of each extract were immunoblotted and proteins were detected using anti-GFP antiserum. Amido black staining served as a loading control.

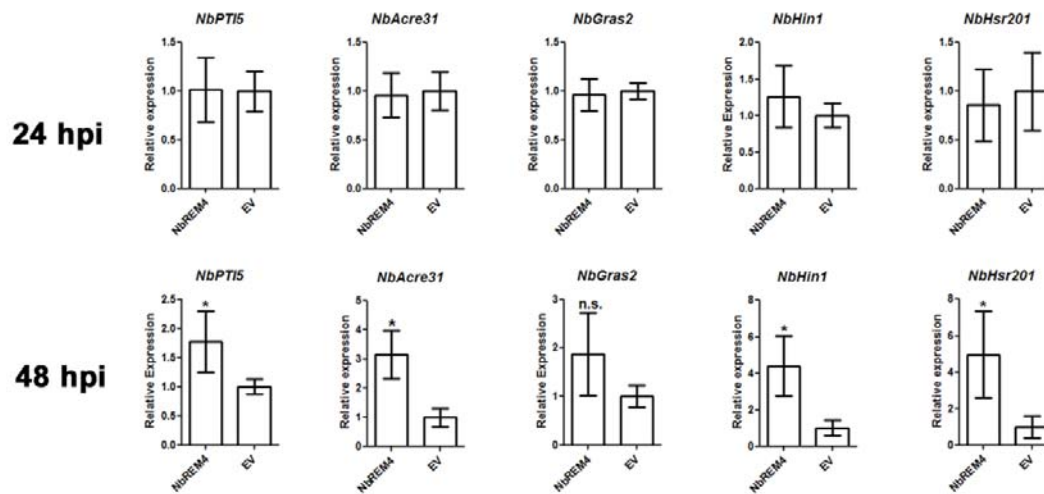

**Figure 6. Expression of selected defense-related genes in *N. benthamiana* leaves transiently expressing NbREM4.** Quantitative real-time PCR (RT-PCR) of indicated defense-related genes was carried out on samples taken from *N. benthamiana* leaves transiently expressing NbREM4 or the empty vector control (EV) at the time points indicated. *Actin* was used as a reference gene. Each bar represents the mean of four biological replicates  $\pm$  SE. \* marks significant differences ( $P > 0.05$ ) according to Student's *t*-test.

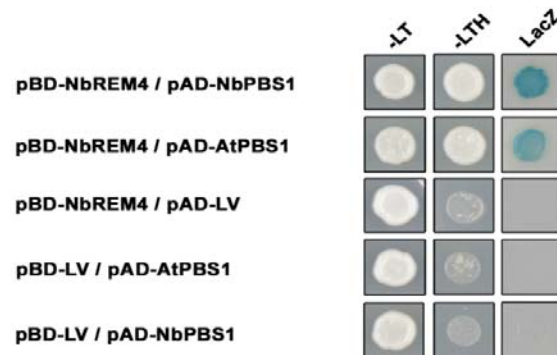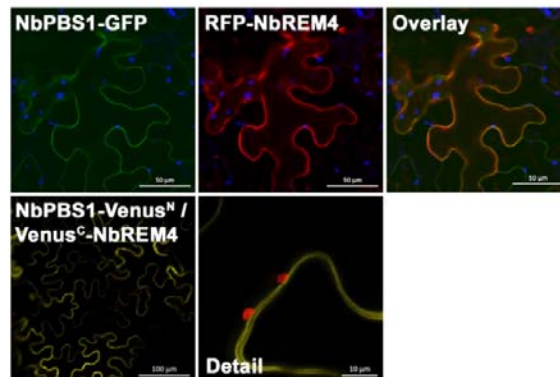

**Figure 7. NbREM4 interacts with PBS1 in yeast two-hybrid assays and *in planta*.** **A**, NbREM4 fused to the GAL4 DNA binding domain (BD) was expressed in combination with PBS1 fused to the GAL4 activation domain (AD) in yeast strain Y190. Cells were grown on selective media before a LacZ filter assay was performed. The empty BD vector or AD vector, respectively, served as negative control. NbPBS1, *N. benthamiana* PBS1; AtPBS1, *A. thaliana* PBS1. – LT, yeast growth on medium without Leu and Trp. – HLT, yeast growth on medium lacking His, Leu, and Trp, indicating expression of the *HIS3* reporter gene. LacZ, activity of the lacZ reporter gene. **B**, Co-localization of NbPBS1-GFP and RFP-NbREM4 in *N. benthamiana* leaf epidermal cells. NbPBS1-GFP was co-expressed with RFP-NbREM4 by *Agrobacterium*-infiltration. The green fluorescence (GFP), red fluorescence (mCherry) and chlorophyll autofluorescence (blue) were monitored separately to prevent cross-talk of the fluorescence channels and the resulting fluorescence images were merged. **C**, BIFC *in planta* interaction of NbPBS1 with NbREM4. YFP confocal microscopy images show *N. benthamiana* leaf epidermal cells transiently expressing NbPBS1-Venus<sup>N</sup> in combination with Venus<sup>C</sup>-NbREM4. A close-up of the same cells shows that the YFP fluorescence produced by the interaction of NbPBS1-Venus<sup>N</sup> with Venus<sup>C</sup>-NbREM4 aligns with the plasma membrane.

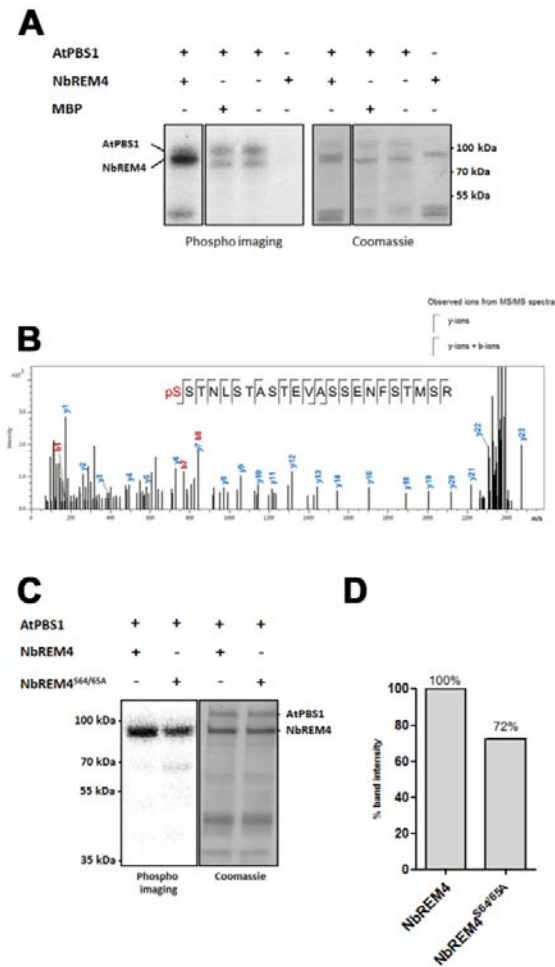

**Figure 8. PBS1 phosphorylates NbREM4 *in vitro*.** **A**, *In vitro* phosphorylation assay of NbREM4 by AtPBS1. Recombinant proteins were incubated in the presence of <sup>32</sup>P-ATP and the mixture was subsequently resolved by SDS-PAGE. MBP (maltose-binding protein) served as a negative control. Left, autoradiogram; right, coomassie blue stain for protein visualization. **B**, MALDI-TOF MS/MS spectrum of an ion at *m/z* 2474.03 derived from *in vitro* phosphorylated NbREM4. Peptide fragmentation provides strong evidence for the sequence <sup>64</sup>S to <sup>86</sup>R of the NbREM4 polypeptide with phosphorylation occurring at <sup>64</sup>S (inset). Intact y-ions are labeled in blue, intact b-ions are labeled in red. **C**, *In vitro* phosphorylation of NbREM4<sup>S64/64A</sup> compared to the wild type NbREM4 protein. Recombinant proteins were incubated in the presence of <sup>32</sup>P-ATP and the mixture was subsequently resolved by SDS-PAGE. Left, autoradiogram; right, coomassie blue stain for protein visualization. **D**, Densitometric analysis of NbREM4<sup>S64/64A</sup> phosphorylation using ImageJ.



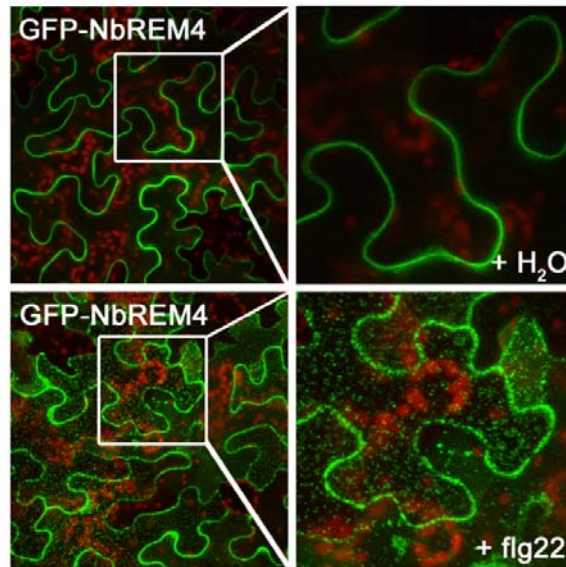

**Figure 9. Relocation of NbREM4 upon flg22 treatment into punctuate structures.** Confocal micrographs of *N. benthamiana* leaf epidermal cells transiently expressing GFP-NbREM4 challenged flg22 as compared to a H<sub>2</sub>O control. The flg22 treatment was performed 48 hpi and 60 min before imaging. Left, overview; right, magnification of the inset indicated on the left.

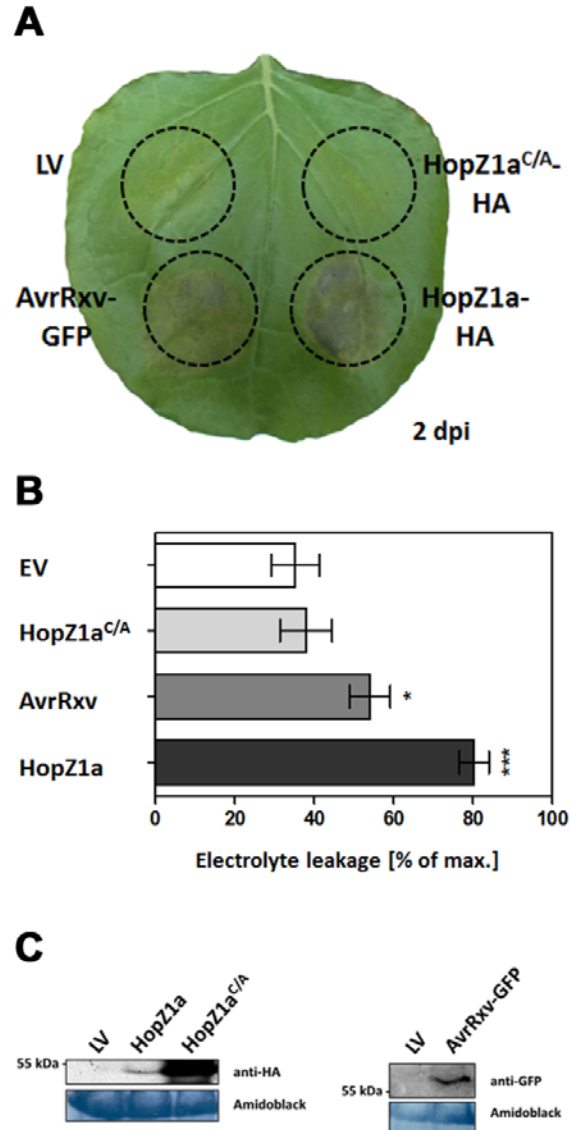

**Figure 10. Transient HopZ1a expression induces an HR in *N. benthamiana* leaves.** **A**, *Agrobacterium*-mediated transient expression assay in *N. benthamiana*. The constructs indicated were inoculated into the leaf areas delineated by the dashed line. The picture was taken 48 hpi. **B**, Ion leakage was measured in plants transiently expressing the constructs indicated 48 hpi with *Agrobacteria*. Bars represent the average ion leakage measured for triplicates of six leaf disks each, and the error bars indicate SD. The asterisk indicates a significant difference (\*\* $P < 0.05$ , \*\*\* $P < 0.01$ ) based on results of a Student's *t*-test. **C**, Protein immunoblot of HopZ1a-HA, HopZ1<sup>C/A</sup>-HA and AvrRxv-GFP, verifying protein expression. Samples were collected 48 hpi and probed with  $\alpha$ -HA antibody or  $\alpha$ -GFP antibody, respectively. Amido-black staining is included to show equal loading of the samples.

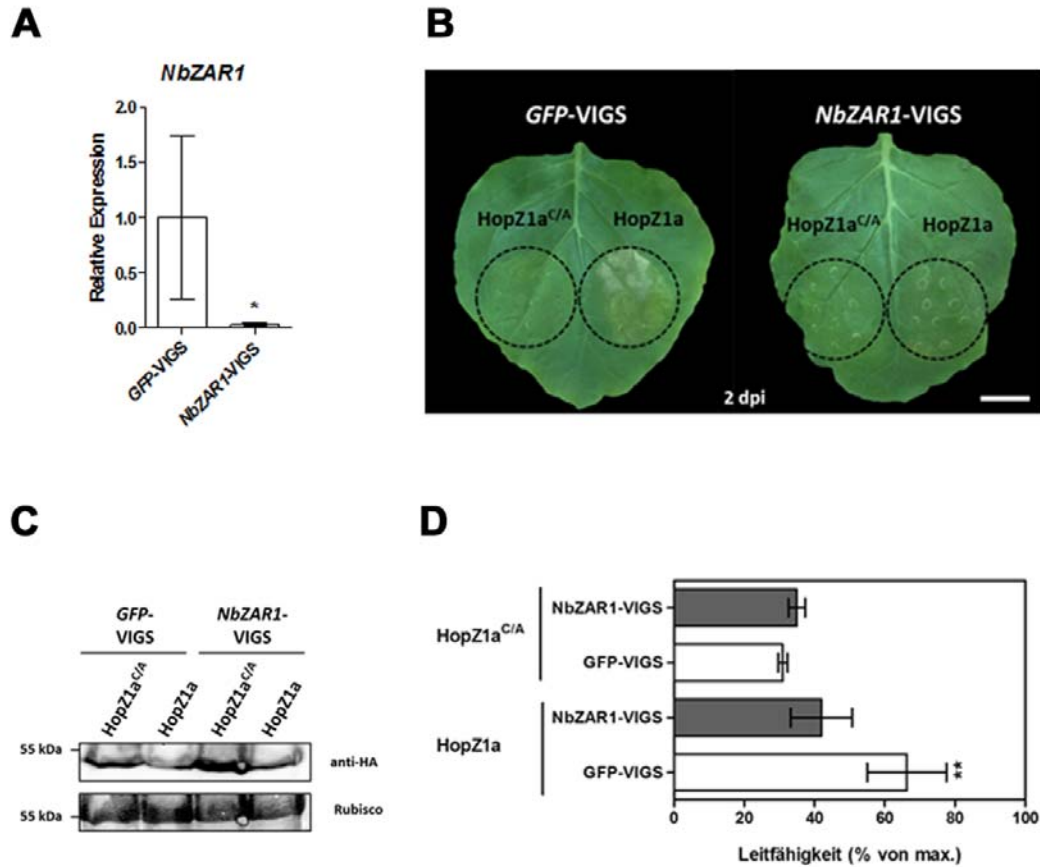

**Figure 11. Down-regulation of ZAR1 expression abolishes HopZ1a triggered HR.** **A**, quantitative real-time RT-PCR analysis of *ZAR1* down-regulation in *NbZAR1*-VIGS *N. benthamiana* plants. Total RNA was isolated from leaves of VIGS plants 14 dpi and subjected to cDNA synthesis followed by qRT-PCR. Bars represent the mean of at least three biological replicates  $\pm$  SD. The asterisk indicates a significant difference ( $*P < 0.05$ ) based on results of a Student's *t*-test. **B**, Leaves of *NbZAR1*-VIGS and *GFP*-VIGS plants were infiltrated with the constructs indicated by the dashed line. **C**, Protein immunoblot of HopZ1a-HA and HopZ1<sup>C/A</sup>-HA, verifying protein expression VIGS plants. Samples were collected 2 dpi and probed with an  $\alpha$ -HA antibody. Amido-black staining is included to show equal protein loading. **D**, Ion leakage was measured in VIGS plants transiently expressing the constructs indicated on the left 48 hpi. Bars represent the average ion leakage measured for triplicates of six leaf disks each, and the error bars indicate SD. The asterisk indicates a significant difference ( $**P < 0.01$ ) based on results of a Student's *t*-test.
